# Supplementary material for: Contribution of Intellectual Disability–Related Genes to ADHD Risk and to Locomotor Activity in Drosophila
Source: Atypon-hosted journal article supplement (doi:10.1176/appi.ajp.2019.18050599), 2020-02-12
Supplement: appi.ajp.2019.18050599.ds001.pdf [file appi.ajp.2019.18050599.ds001.pdf]

Data supplement for Klein et al., Contribution of Intellectual Disability–Related Genes to ADHD Risk and to Locomotor Activity in *Drosophila*. Am J Psychiatry (doi: 10.1176/appi.ajp.2019.18050599)

## SUPPLEMENTARY METHODS

### GWAS of ADHD symptom scores in the Nijmegen Biomedical Study

The Nijmegen Biomedical Study is a population-based survey conducted at the Department of Health Evidence, and the Department of Laboratory Medicine of the Radboud university medical center(1). Within the NBS cohort information using the ADHD-RS(2), a self-report DSM-IV-based symptom list with high validity in population-based and case samples, was collected (**Table S4**). Total ADHD hyperactivity/impulsivity and inattention symptoms were transformed, by using the Blom-transformation, to achieve a normal distribution. Detailed procedures of DNA isolation have been described previously(1). Genome-wide genotyping was carried out using the Illumina HumanOmniExpress-12 platform. Quality control, imputation and association analyses were done using the bioinformatics pipeline Ricopili (<https://sites.google.com/a/broadinstitute.org/ricopili/>). Stringent quality control was applied to the cohort following standard procedures for GWAS, including filters for call rate, Hardy-Weinberg equilibrium and heterozygosity rates. The NBS cohort was then phased and imputed using the 1000 Genomes Project phase 3 (1KGP3)(3, 4) imputation reference panel using Eagle(5) and Minimac3(6), respectively. Cryptic relatedness and population structure were evaluated using a set of high-quality markers pruned for linkage disequilibrium (LD). Genetic relatedness was estimated using PLINK v1.9(7, 8) to identify first and second-degree relatives and one individual was excluded from each pair. Genetic outliers were identified for exclusion based on principal component analysis using EIGENSOFT (version 5.0.1)(1, 9, 10). Genome-wide association analysis has been performed using a linear regression under an additive model in PLINK v1.9 (7, 8) using Ricopili

(<https://sites.google.com/a/broadinstitute.org/ricopili/>). Age and gender were included as covariates. The first ten principal components were added to account for possible population stratification effects. For subsequent gene-based analyses, only SNPs with an INFO score  $\geq 0.8$  and MAF  $\geq 0.01$  were included.

### **Gene-based and gene-set analysis**

We extracted SNPs and association p-values from the PGC ADHD GWAS-MA for the ID gene-set. Since this meta-analysis only covered the autosomes, X-chromosomal genes were excluded, leaving 396 autosomal genes. All SNPs lying within these genes (according to UCSC hg19 position(11)), including flanking regions of 100 kb to capture regulatory regions, were extracted. In total, 308,952 SNPs with a MAF  $\geq 0.01$  and INFO-score  $\geq 0.8$  were considered for further analysis. The gene-based and gene-set association analyses in the iPSYCH data were performed at secured servers in Denmark at the GenomeDK high performance-computing cluster (<http://genome.au.dk>) by the responsible researcher using the same protocols.

We used two software packages to test whether the ID gene-set was associated with ADHD risk. Firstly, the Hybrid set-based test (HYST) of the Knowledge-based mining system for Genome-wide Genetic studies (KGG) version 3.5 software(12) was used for association testing. Within this software package, we chose the Hybrid set-based test (HYST)(13) for association testing. A text file listing all 396 autosomal ID genes and a text file listing all SNPs that were extracted from the PGC ADHD GWAS-MA, were used as input for KGG. Imputed and quality-controlled genome-wide genotyping data of the Brain Imaging Genetics (BIG) cohort(14) were used as a reference to define the underlying linkage disequilibrium (LD) structure. The LD upper limit was set to a  $r^2$  of 0.8, while the lower limit was set to 0.2. Next, a gene-based association scan was run with HYST, based on a hybrid test of Gates and a scaled Chi-square test, in which SNPs without LD information were ignored. Gene-set and gene-based p-values were calculated

for 388 genes, since eight genes could either not be annotated by the reference file (*ATP1A2*, *ERCC2*, *GRIK2*, *GSS*, *KIAA1279*, *MMACHC*, and *TCF4*) or had too few SNPs left after quality control (*B4GALT7*).

Secondly, the Multi-marker Analysis of GenoMic Annotation (MAGMA) software version 1.02(15) was used. First, genome-wide SNP data from a reference panel (1000 Genomes, v3 phase1(3)) were annotated to NCBI Build 37.3 gene locations using a symmetric 100 kb flanking window, and both files were downloaded from <http://ctglab.nl/software/magma>. Next, the gene annotation file was used to map the genome-wide SNP data to assign the SNPs to the genes and to calculate gene-based p-values for each cohort separately. For the gene-based analyses, single SNP p-values within a gene were transformed into a gene-statistic by taking the mean of the  $\chi^2$ -statistic among the SNPs in each gene. To account for LD, the 1000 Genomes Project European sample was used as a reference to estimate the LD between SNPs within (the vicinity of) the genes ([http://ctglab.nl/software/MAGMA/ref\\_data/g1000\\_ceu.zip](http://ctglab.nl/software/MAGMA/ref_data/g1000_ceu.zip)). Gene-wide p-values were converted to z-values reflecting the strength of the association of each gene with the phenotype, with higher z-values corresponding to stronger associations. Subsequently, we tested, whether all 396 ID-related genes in the gene-set are jointly associated with each of the phenotypes, using an intercept-only linear regression model including a subvector corresponding to the genes in the gene-set. This self-contained analysis evaluated, whether the regression coefficient of this regression was larger than 0, testing whether the gene-set contains any association at all. To test if the genes in the gene-set are more strongly associated with each phenotype than other genes, the regression model was then expanded including all genes outside the gene-set. This competitive test tested, whether the association of a gene-set is different from association of genes outside the gene-set. To account for the potentially confounding factors of gene size and gene density, both gene size and gene density as well as their logarithms were included as covariates in the competitive gene-set analysis. Four genes were not

included in the analyses, because they were either missing from the annotation file (*CHKB-CPT1B* and *SOX2-OT*) or contained too few SNPs (*B4GALT7* and *RAB3GAP2*).

The analyses were carried out in two steps. In step 1, the combined effect of the SNPs in (the vicinity of) all ID genes was analyzed. Post hoc, in step 2, the potential effects of the individual genes were investigated, by reviewing their gene-based test-statistics. Genes were considered gene-wide significant if they reached the Bonferroni correction threshold adjusted for the number of genes tested ( $P < 0.000128$ ).

## **Validation of *Drosophila* models**

### ***Drosophila* Immunolabellings**

The driver line expression pattern was validated by using the driver to drive GFP expression in the adult *Drosophila* brain. Female virgins of the driver lines were crossed with the males of a membrane-GFP expression line (Bloomington stock #5137:  $y^1w^*$ ; *UAS-mCD8::GFP.L*). Flies were grown at 25°C, 70% relative humidity (RH). Brains of 3–5 day-old males were dissected, rinsed with phosphate buffered saline (PBS), and fixed in 3.7% paraformaldehyde at room temperature for 30 minutes. The fixed brains were rinsed with 0.3% Triton X-100 in PBS (PBST) and then blocked in blocking buffer containing 3% normal goat serum (NGS) in PBST at room temperature for 1 hour. Brains were then incubated with primary antibody rabbit anti-GFP (Invitrogen) in blocking buffer (1:600) at 4°C for 72h and washed five times in PBST at room temperature for 10 minutes. Subsequently, brains were incubated with secondary antibody Alexa488 goat anti-rabbit (Molecular Probes) in blocking buffer (1:700) at 4°C for 48h and washed with PBST at room temperature for 5x 10 minutes, before being mounted on slides with mounting medium ProLong Gold Antifade (Life Technologies). Images of the brains were taken in stacks

at 200x magnification with Zeiss Axio Imager microscope (with Apotome.2); exposure time was kept constant. The maximum projections of the images were created using FIJI 1.51n(16).

### **mRNA extraction and Quantitative Real Time PCR (qRT-PCR)**

The efficiency of the utilized *dMEF2* RNAi lines was previously validated (17-20). The efficiency of the *dTRAPPC9* RNAi line had not previously been established. Therefore, we validated the *dTRAPPC9* RNAi efficacy by driving *dTRAPPC9* knock down with the ubiquitous driver (Bloomington stock #4414: *w<sup>\*</sup> UAS-Dcr2; Act5C-Gal4/CyOGFP*; ) and measuring the difference of the *dTRAPPC9* transcript level. The males of the RNAi and genetic background lines were crossed with the virgins of the ubiquitous driver line, raised at 25°C, 70% RH. For qRT-PCR, 3–5 days old male progeny were collected with CO<sub>2</sub>, snap-frozen, and the total RNA was isolated with RNeasy Lipid Tissue kit (Qiagen). The isolated RNA concentration was quantified with Nanodrop (Thermo Fisher Scientific). A total of 200 ng RNA was converted to cDNA with the iScript kit (BioRad). The cDNA was used as a template for qRT-PCR using the SybrGreen kit (Applied Biosystems) in 96-well plate format in a 7900HT Fast Real-Time PCR system (Applied Biosystems). The following primers were used in qRT-PCR: *β' COP* (forward: 5'-aactacaacaccctggagaagg-3'; reverse: 5'- acatcttctcccaattccaag-3'), *Rpl1215* (forward: 5'- ccgcgatacttctctccac-3'; reverse: 5'- gaccagctaggcgacattc-3'), *dTRAPPC9* (forward: 5'- aaagtgcgacgtgtcaatcac-3'; reverse: 5'- gtgctccacaggatgatcgt-3'). A threshold was carefully applied to determine the cycle threshold (C<sub>T</sub>) values using SDS 2.4 software (Applied Biosystems). The fold change of *dTRAPPC9* was calculated with  $\Delta\Delta C_T$  method(21). Significance was calculated using paired T-test in GraphPad 5.03 (San Diego, CA).

**URLs**

<https://www.med.unc.edu/pgc/results-and-downloads>

[http://ctglab.nl/software/MAGMA/ref\\_data/g1000\\_ceu.zip](http://ctglab.nl/software/MAGMA/ref_data/g1000_ceu.zip)

<http://locuszoom.sph.umich.edu/>

[https://issuu.com/radboudumc/docs/ngs-intellectual\\_disability\\_panel\\_1?e=28355229/50899368](https://issuu.com/radboudumc/docs/ngs-intellectual_disability_panel_1?e=28355229/50899368)

**DATA AVAILABILITY**

GWAS summary statistics used in the paper are available directly from the web for ADHD GWAS-MA data of the PGC ADHD Working Group and the combined ADHD GWAS-MA data of the PGC ADHD Working Group of the PGC + ADHD iPSYCH-SSI-Broad collaboration

(<https://www.med.unc.edu/pgc/results-and-downloads>). The ID gene-set can be downloaded from

[https://issuu.com/radboudumc/docs/ngs-intellectual\\_disability\\_panel\\_1?e=28355229/50899368](https://issuu.com/radboudumc/docs/ngs-intellectual_disability_panel_1?e=28355229/50899368) on

March 27<sup>th</sup>, 2014. All data needed to evaluate the conclusions in the paper are present in the paper or the supplementary materials.

SUPPLEMENTARY FIGURES

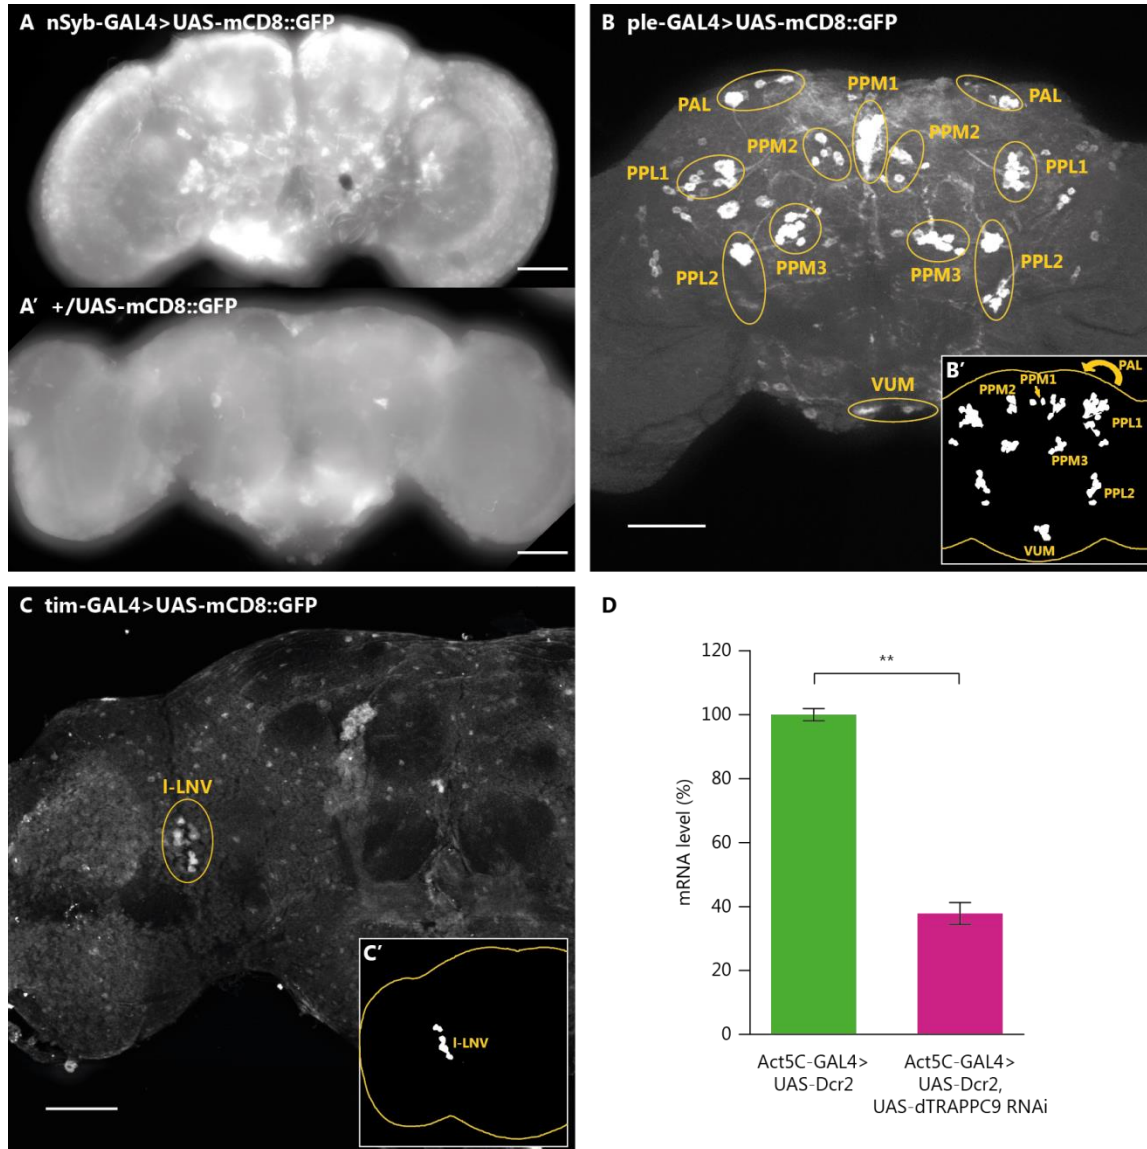

**FIGURE S1.** Validation of the *Drosophila* lines used in this study. **(A)** Maximum projection of adult male brains of membrane GFP expression driven by *nSyb-GAL4* (*nSyb-GAL4>UAS-mCD8::GFP*), and of **(A')** non-induced *UAS-mCD8::GFP* (*+/UAS-mCD8::GFP*), illustrating background staining. Using same exposure time, the intensity of fluorescent signal from *nSyb-GAL4>UAS-mCD8::GFP* is higher compared to non-induced *UAS-mCD8::GFP*; the broad expression of *nSyb* can be appreciated as labelling of granular appearance throughout most parts of the brain. Maximum projection of adult male brains of membrane GFP expression driven by **(B)** *ple-GAL4* (*ple-GAL4>UAS-mCD8::GFP*) and **(C)** *tim-GAL4* (*tim-GAL4>UAS-mCD8::GFP*) taken using Apotome.2 for optical sectioning. Sketches of **(B')** *ple-GAL4* and **(C')** *tim-GAL4* expression pattern, illustrating their expression pattern with identifiable neurons, matching the pattern

described in the literatures(22, 23). **(A-C)** The fluorescent patterns of all three drivers, *nSyb-Gal4*, *ple-GAL4* and *tim-GAL4* matches their described expression pattern. All scale bars indicate 50  $\mu\text{m}$ . **(D)** Relative expression of dTRAPPC9 mRNA in the indicated genotypes (driver control in green, *dTRAPPC9* knock down in magenta), as determined by quantitative real-time PCR (qRT-PCR). Both values have been normalized against the control condition. 3 days old adult male were used; Ubiquitous knockdown of *dTRAPPC9* (*Act5C-GAL4> UAS-Dcr2, UAS-dTRAPPC9<sup>RNAi</sup>*) results in reduced expression of *dTRAPPC9* to 40% compared to control (*Act5C-GAL4>UAS-Dcr2*). n=3 biological replicate; error bars represent standard error of means (SEM); \*\*p<0.01.



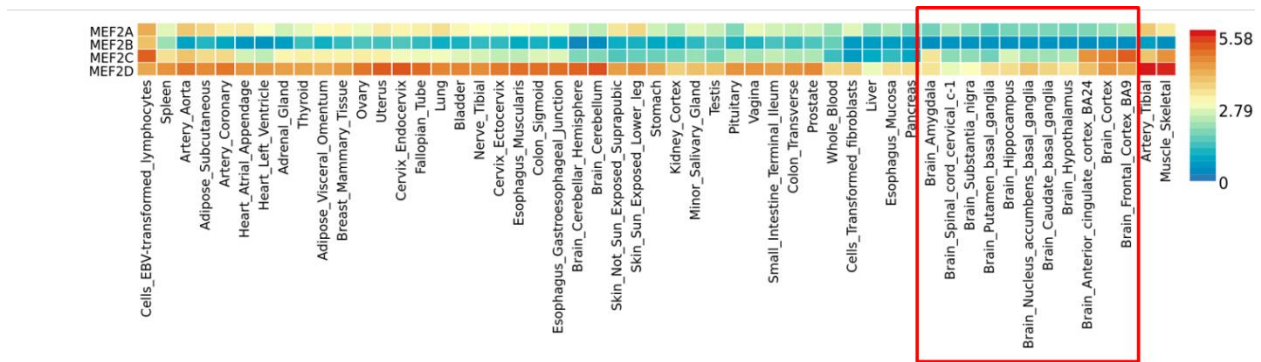

**FIGURE S2.** Gene expression heatmap. Showing gene expression of *MEF2* genes in 53 tissue types of GTEx v6 (<https://gtexportal.org/home/>). Heatmap was created by using FUMA (<https://fuma.ctglab.nl/>). The red box indicates all brain-related tissues.

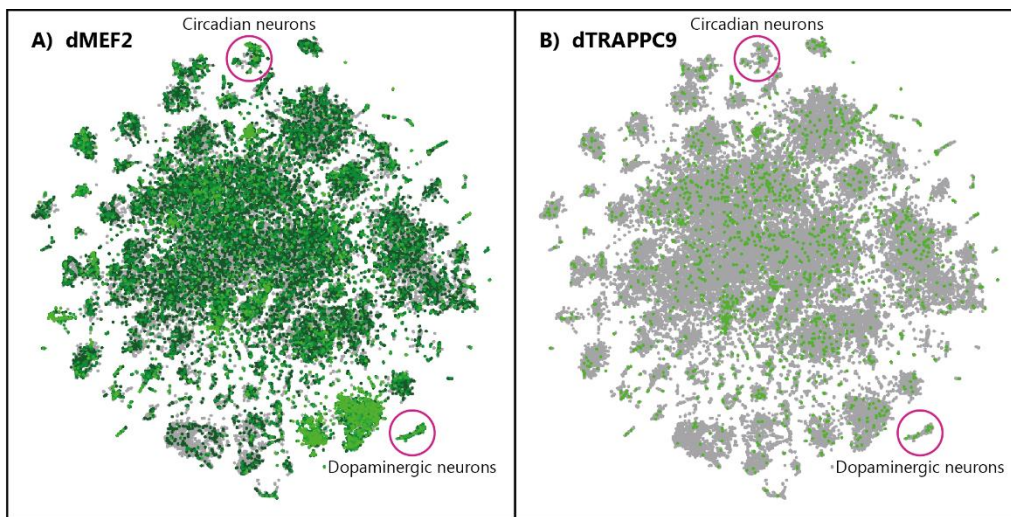

**FIGURE S3.** *dMEF2* and *dTRAPPC9* are expressed in dopaminergic and circadian neuronal populations. (A, B) t-SNE plot of (A) *dMEF2* and (B) *dTRAPPC9* mRNA detected in adult *Drosophila* brain (24). The dopaminergic and circadian neuronal populations are encircled in magenta. Overall, both genes, but especially *dMEF2*, appear to be widely expressed according to their mRNA levels. Immunolabeling experiments indeed consistently showed more localized expression of the *dMEF2* protein (25-27). This may indicate that *dMEF2* is post-transcriptionally regulated.

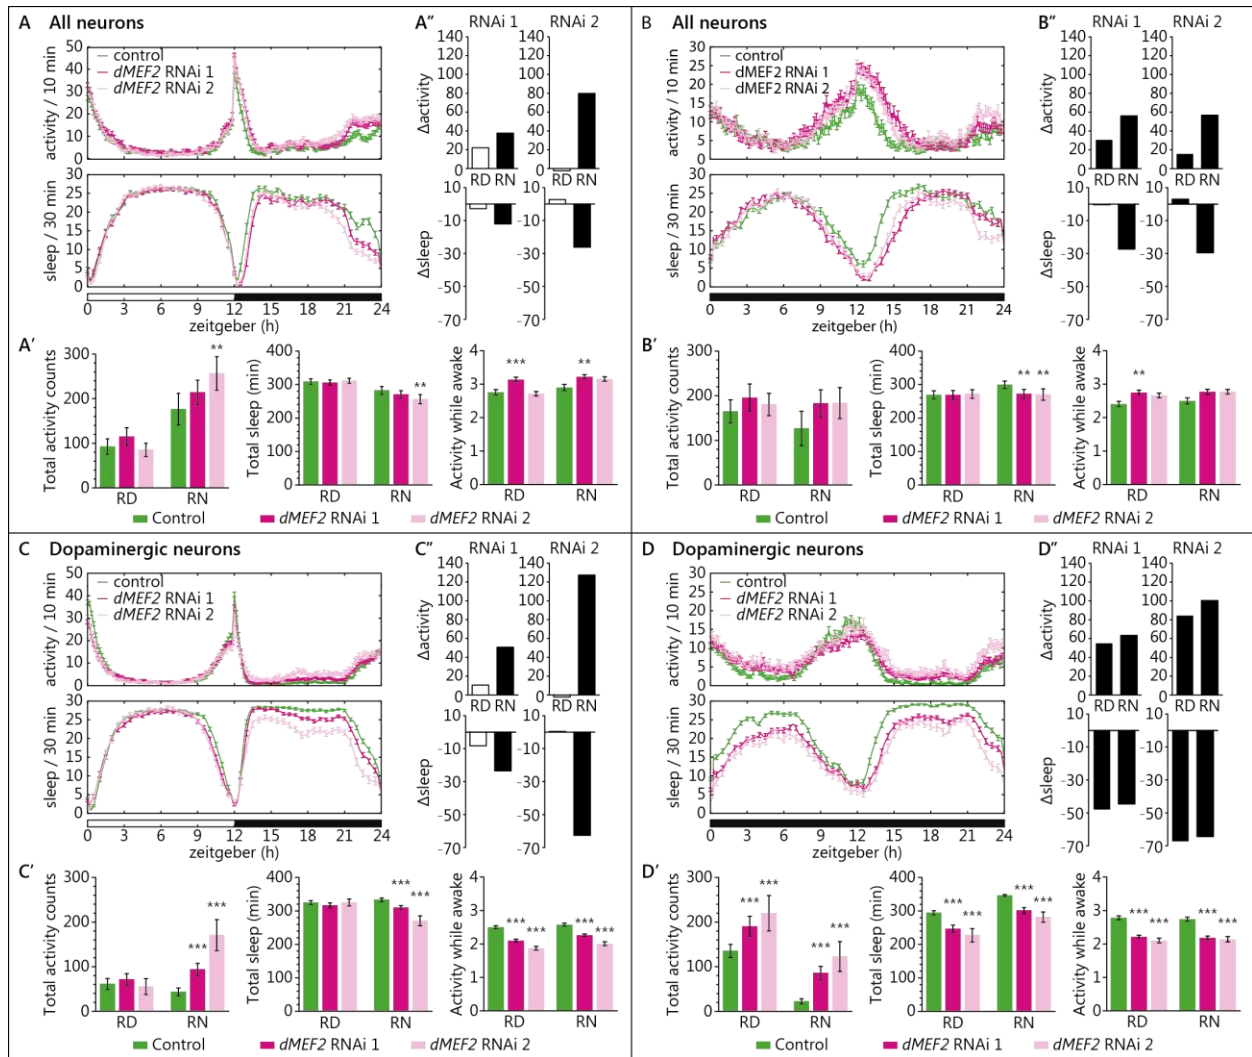

**FIGURE S4.** Knockdown of *dMEF2* in all neurons using two independent RNAi lines (A, B), or specifically in dopaminergic neurons (C, D), resulted in higher activity and reduced sleep in the relative night. (A, B) Activity and sleep plots of pan-neuronal *dMEF2* knockdown, (A) in 12-hour light:dark cycle and (B) constant darkness. (A', B') Quantification of total activity, sleep, and activity while awake during stable periods (RD: zeitgeber 3-9h, RN: zeitgeber 15-21h) excluding the activity peaks (zeitgeber 0-3h, 9-15h, and 21-24h). Pan-neuronal knockdown of *dMEF2* with both RNAi lines showed a tendency towards increased activity and activity while awake, as well as sleep loss during the RN period in both 12-hour light:dark cycle and constant darkness. (A'', B'')  $\Delta_{\text{activity}}$  and  $\Delta_{\text{sleep}}$ : the findings for 12-hour light:dark cycle and for constant darkness both reveal that the difference between groups is greater in the absence of light. (C, D) Activity and sleep plot of dopaminergic neuron *dMEF2* knockdown, (C) in 12-hour light:dark cycle and (D) constant darkness. (C', D') Quantification of total activity, sleep, and activity while awake during stable periods (RD: zeitgeber 3-9h, RN: zeitgeber 15-21h) excluding the activity peaks (zeitgeber

0-3h, 9-15h and 21-24h). Dopaminergic neuronal knockdown of *dMEF2* with both RNAi lines showed increased activity and decreased sleep in the RN period and both in RD and RN during constant darkness. The knockdown showed lower activity while awake than the control in both RD and RN in 12-hour light:dark cycle and also in constant darkness. **(C", D")**  $\Delta_{\text{activity}}$  and  $\Delta_{\text{sleep}}$ : the findings for 12-hour light:dark cycle and for constant darkness both reveal that the difference between groups is greater in the absence of light. RD, relative day; RN relative night. Error bars represent standard error of means (SEM). N=3 biological replicates, minimum 20 flies/replicate; \*P<0.0167 (Bonferroni correction threshold), \*\*P<0.01, \*\*\*P<0.001.

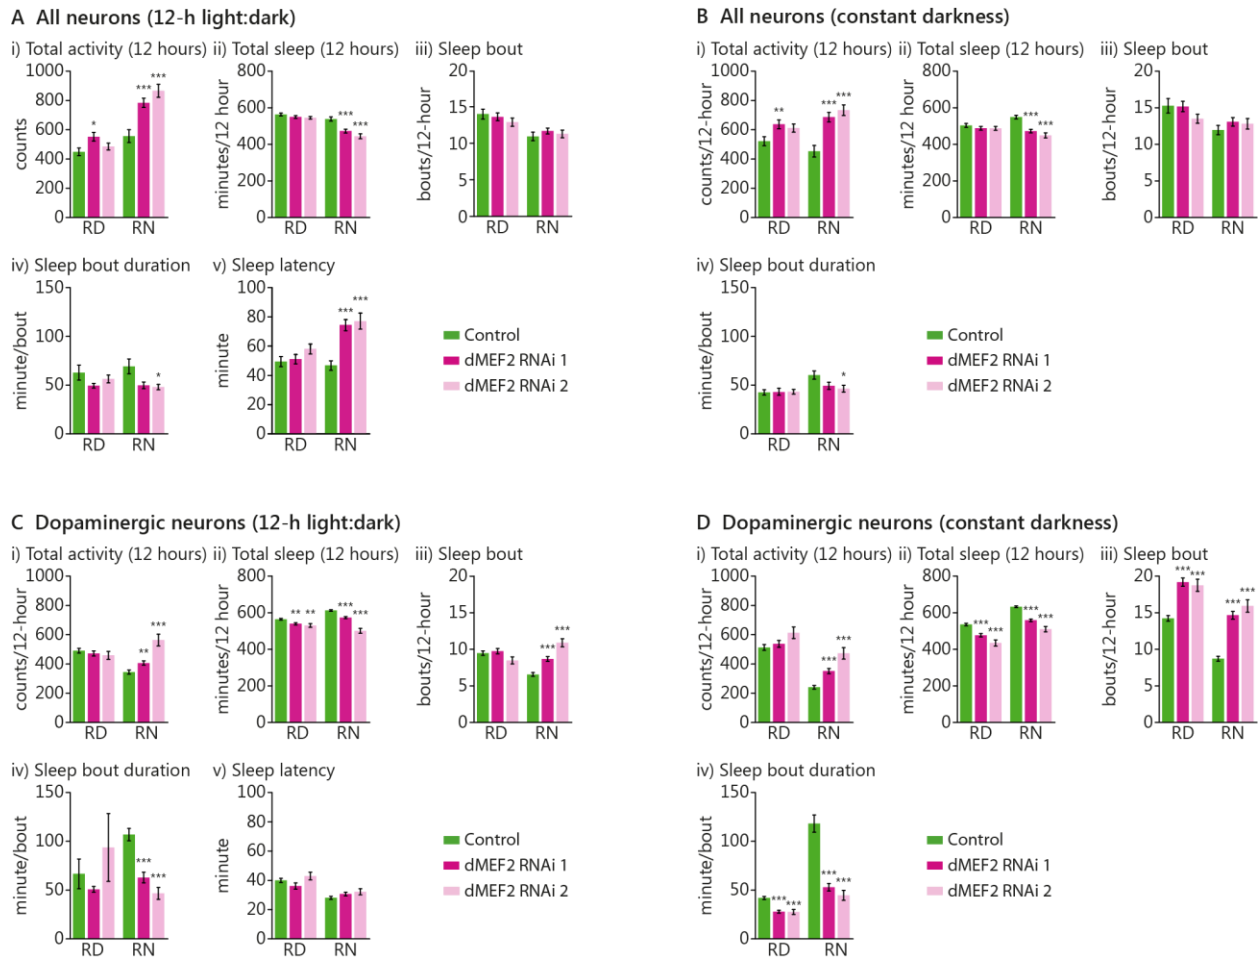

**FIGURE S5.** Quantification of activity and sleep parameters of *dMEF2* knockdown, calculated over the entire 12-hour day and 12-hour night. **(A,B)** Activity and sleep parameters of pan-neuronal knockdown of *dMEF2* monitored in **(A)** 12-hour light:dark cycle and **(B)** constant darkness. **(C,D)** Activity and sleep parameters of dopaminergic neuron knockdown of *dMEF2* monitored in **(C)** 12-hour light:dark cycle and **(D)** constant darkness. Sleep latency parameter is only available for 12-h light:dark cycle. RD, relative day; RN, relative night. Error bars represent standard error of means (SEM) \* $P < 0.0167$  (Bonferroni correction threshold), \*\* $P < 0.01$ , \*\*\* $P < 0.001$ .

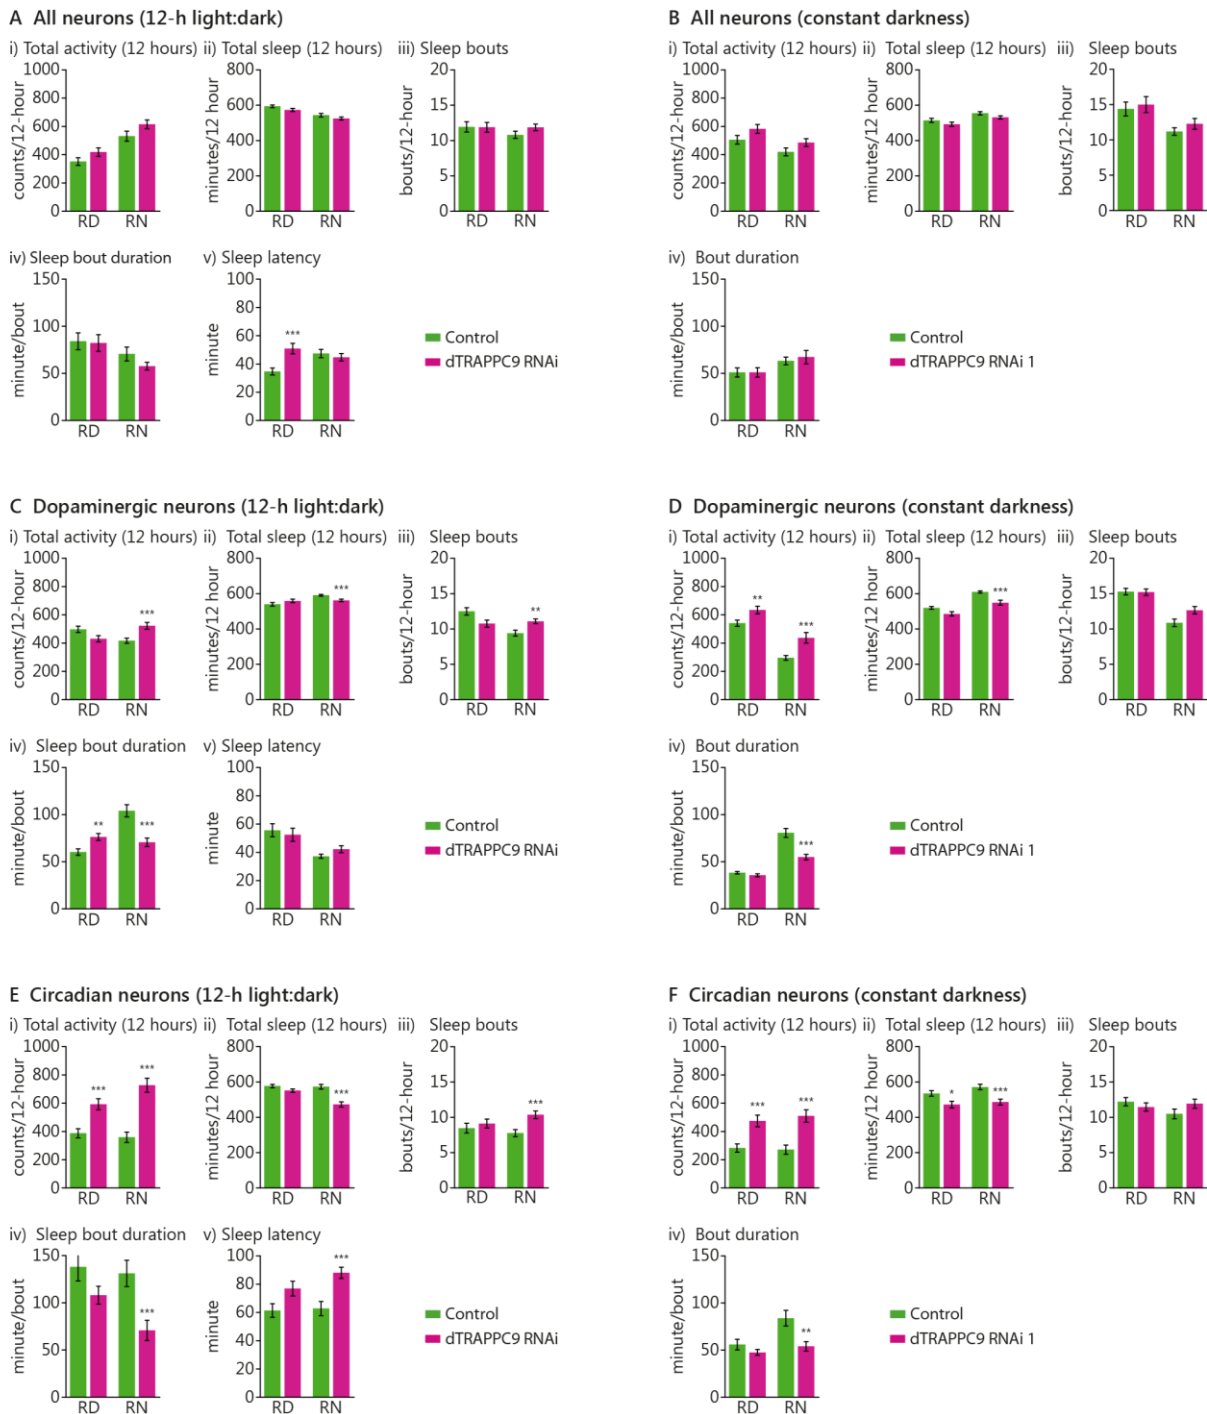

**FIGURE S6.** Quantification of activity and sleep parameters of *dTRAPPC9* knockdown, calculated for the entire 12-hour day and 12-hour night. **(A,B)** Activity and sleep parameters of pan-neuronal knockdown of *dTRAPPC9* monitored in **(A)** 12-hour light:dark cycle and **(B)** constant darkness. **(C,D)** Activity and sleep parameters of dopaminergic neuron knockdown of *dTRAPPC9* monitored in **(C)** 12-hour light:dark

cycle and **(D)** constant darkness. **(E,F)** Activity and sleep parameters of circadian neuron knockdown of *dTRAPPC9* monitored in **(E)** 12-hour light:dark cycle and **(F)** constant darkness. Sleep latency parameter is only available for 12-h light:dark cycle. RD, relative day; RN, relative night. Error bars represent standard error of means (SEM) \*P<0.0167 (Bonferroni correction threshold), \*\*P<0.01, \*\*\*P<0.001.



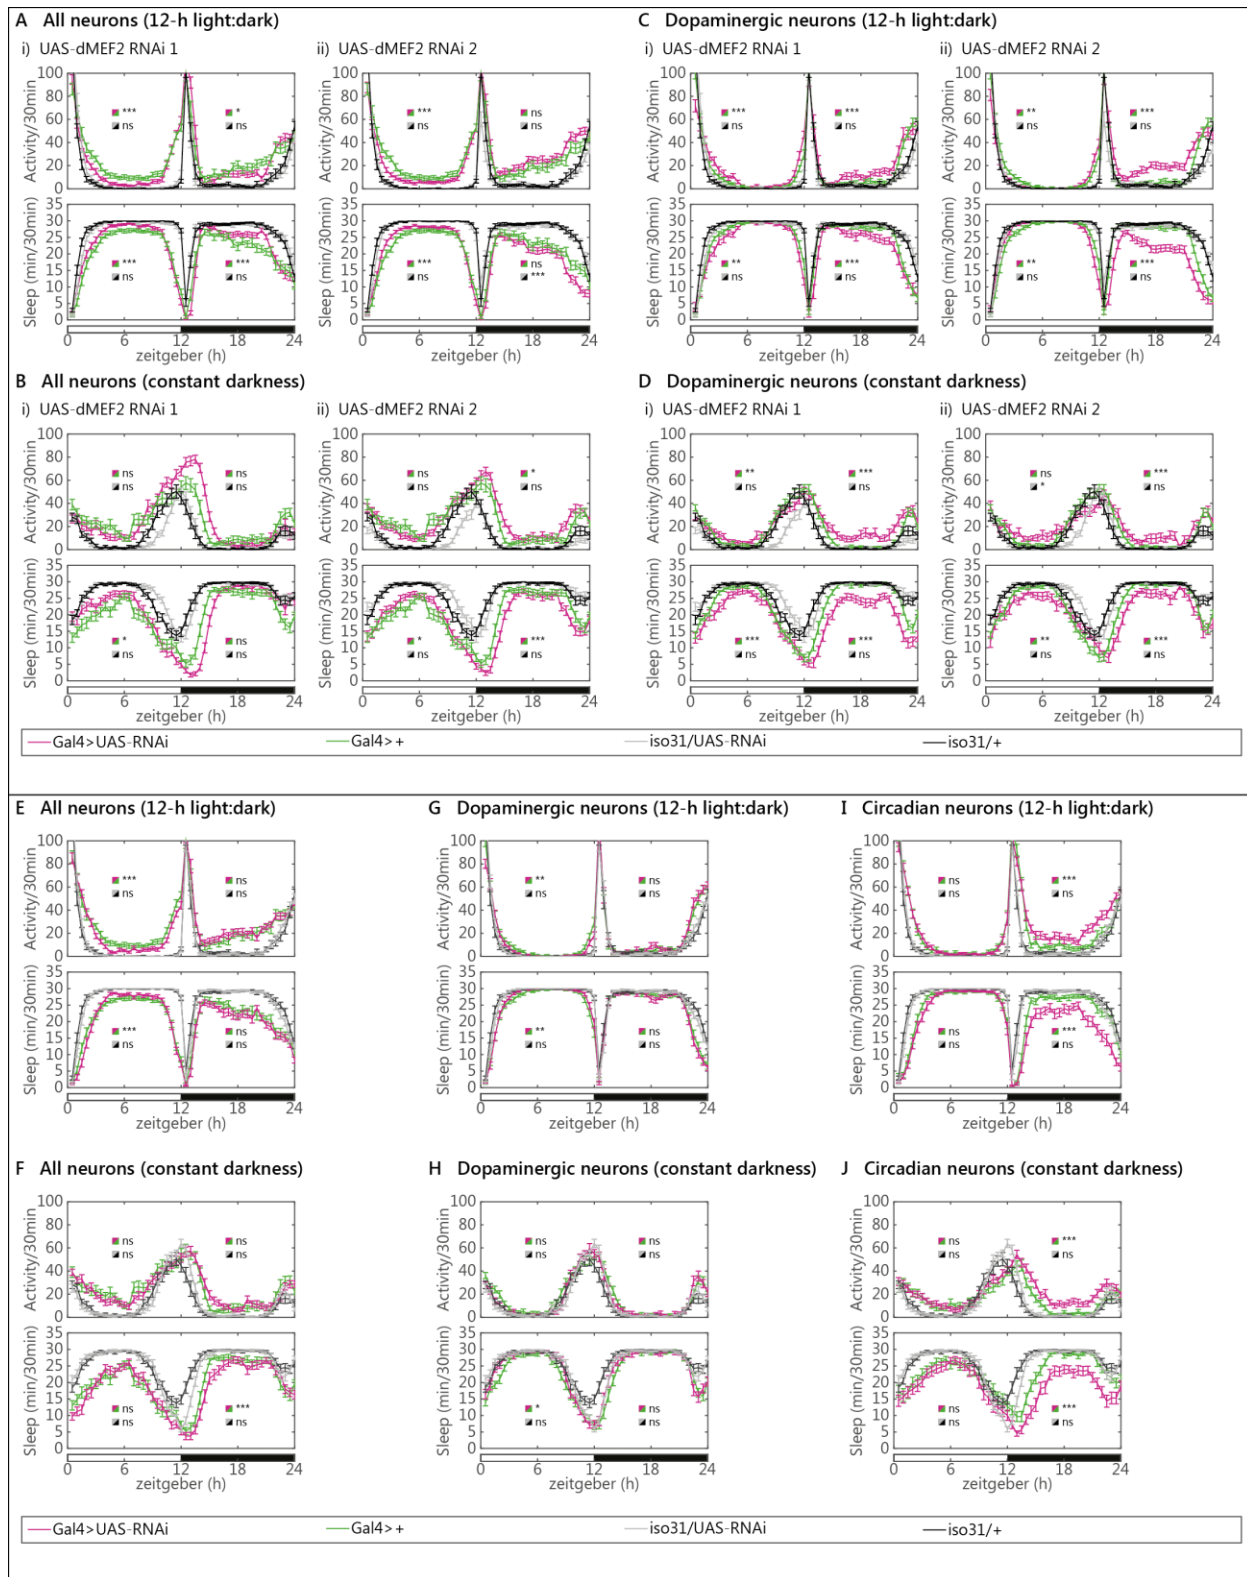

**FIGURE S7.** Uninduced *dMEF2* and *dTRAPPC9* RNAi lines have similar activity and sleep to the genetic background control, demonstrating specificity of obtained phenotypes. **(A, B, C, D)** Activity and sleep

profile of *dMEF2* knockdown in **(A,B)** all neurons and **(C,D)** dopaminergic neurons. **(E,F,G,H,I,J)** Activity and sleep profile of *dTRAPPC9* knockdown in **(E,F)** all neurons and **(G,H)** dopaminergic neurons and **(I,J)** circadian neurons, monitored in **(A,C,E,G,I)** 12-h light:dark scheme and **(B,D,F,H,J)** constant darkness.



**SUPPLEMENTARY TABLES**

**TABLE S1.** Description of individual PGC ADHD cohorts as included in the PGC ADHD GWAS-MA

| Study name |                                                                                                                                 | Study design | Ancestry                      | Cases<br>(N <sup>a</sup> ) | Controls<br>(N <sup>a</sup> ) | Genotyping platform                                                                                | Reference <sup>b</sup> |
|------------|---------------------------------------------------------------------------------------------------------------------------------|--------------|-------------------------------|----------------------------|-------------------------------|----------------------------------------------------------------------------------------------------|------------------------|
| Short      | Full sample name                                                                                                                |              |                               |                            |                               |                                                                                                    |                        |
| CARD       | UK sample                                                                                                                       | Case/control | Caucasian                     | 727                        | 5,081                         | Illumina Human660W-Quad<br>BeadChip (ADHD cases) and<br>Illumina Human 1.2M BeadChip<br>(controls) | (28)                   |
| CHIN       | Chinese sample                                                                                                                  | Case/control | Han Chinese                   | 1,040                      | 963                           | Affymetrix 6.0 array                                                                               | (29)                   |
| CHOP       | Children’s Hospital of<br>Philadelphia                                                                                          | Trio/control | European<br>descent           | 335<br>trios               | 2026                          | Illumina Infinium II HumanHap550<br>BeadChip                                                       | (30)                   |
| GERM       | ADHD patient sample<br>consisted of children and<br>adolescents Aachen, Cologne,<br>Essen, Marburg, Regensburg,<br>and Würzburg | Case/control | Caucasian<br>(all German)     | 495                        | 1,300                         | Illumina Human660W-<br>Quadv1(ADHD cases) and Illumina<br>HumanHap550v3 (controls)                 | (31)                   |
| CROS       | Toronto University, SickKids<br>project                                                                                         | Trio         | Mainly<br>Caucasian           | 170                        |                               | Affymetrix 6.0 array                                                                               | (32)                   |
| IMAGE1     | Phase I of the International<br>Multisite ADHD Genetics<br>Project                                                              | Trio         | Western<br>European<br>origin | 909<br>trios               |                               | Perlegen Sciences 600 K                                                                            | (33)                   |

|              |                                                                                                                                  |              |                               |              |               |                                                                        |      |
|--------------|----------------------------------------------------------------------------------------------------------------------------------|--------------|-------------------------------|--------------|---------------|------------------------------------------------------------------------|------|
| IMAGE2       | Phase II of IMAGE                                                                                                                | Case/control | Predominantly European origin | 896          | 2,455         | Affymetrix 5.0 array (ADHD cases) and Affymetrix 6.0 arrays (controls) | (34) |
| PuWMa        | Pfizer funded study from the University of California, Los Angeles, Washington University and the Massachusetts General Hospital | Trio         | Mainly Caucasian              | 735          | trios         | Illumina Human1M or Human1M-Duo BeadChip platform                      | (35) |
| SPAN         | Spanish sample                                                                                                                   | Case/control | Caucasian                     | 607          | 584           | Illumina HumanOmni1-Quad BeadChip platform                             | (36) |
| <b>TOTAL</b> |                                                                                                                                  |              |                               | <b>5,621</b> | <b>13,589</b> |                                                                        |      |

---

<sup>a</sup> Based on sample of primary publication <sup>b</sup> Primary publication reporting individual study sample.

**TABLE S2.** ID gene panel listing 490 candidate genes for ID

>>> see file *appi.ajp.2019.18050599.ds002\_TableS2.pdf* <<<

**TABLE S3.** Results of gene-based association analyses for 396 ID-related genes with ADHD risk in the PGC ADHD GWAS-MA data (n=19,210). Results for both KGG and MAGMA analyses, using a 100 kb flanking region, are shown.

>>> see file *appi.ajp.2019.18050599.ds003\_TableS3.pdf* <<<

N/A: no gene-based result obtained for this gene.

**TABLE S4.** Descriptive information for the Nijmegen biomedical Study (NBS) cohort and for phenotype assessment (1)

| <b>N (% F)</b> | <b>Age (SD)</b>    | <b>Mean HI score (SD)</b> | <b>Mean IA score (SD)*</b> |
|----------------|--------------------|---------------------------|----------------------------|
| 3019 (53.7%)   | 58.7695 (16.29241) | 4.6706 (3.02432)          | 4.4495 (3.41122)           |

HI=Hyperactivity/impulsivity symptoms, IA=inattention symptoms, \* N=2,978

**TABLE S5.** Results of gene-based association analyses with hyperactivity/impulsivity in the NBS cohort (N=3,019 for HI analyses and N=2,978 for IA analyses)

| Gene           | P Hyperactivity/impulsivity | P Inattention |
|----------------|-----------------------------|---------------|
| <i>MEF2C</i>   | 0.016852                    | 0.79178       |
| <i>TRAPPC9</i> | 0.022311                    | 0.18314       |
| <i>ST3GAL3</i> | 0.69772                     | 0.46721       |

None of the gene-based association results remains significant after correction for multiple testing (P<0.00833).

**TABLE S6.** Summary of results of functional characterization of *dMef2* and *dTRAPPC9* knockdown in *Drosophila* in 12-hour light:dark cycle

|                             | Number of flies (N) | Activity |      |          | Sleep  |          |      | Activity while awake |        |          |        |          |         |
|-----------------------------|---------------------|----------|------|----------|--------|----------|------|----------------------|--------|----------|--------|----------|---------|
|                             |                     | Total RD | P    | Total RN | P      | Total RD | P    | Total RN             | P      | Total RD | P      | Total RN | P       |
| <b>Pan-neuronal</b>         |                     |          |      |          |        |          |      |                      |        |          |        |          |         |
| <i>dMef2</i> control        | 62                  | 92.63    |      | 176.65   |        | 308.69   |      | 282.78               |        | 2.76     |        | 2.899043 |         |
| <i>dMef2</i> RNAi           | 135                 | 100.13   | 0.50 | 235.25   | 0.0059 | 308.66   | 1.0  | 263.72               | 0.014  | 2.94     | 0.0552 | 3.187696 | 0.0066* |
| <i>dMef2</i> RNAi 1         | 68                  | 114.76   | 0.10 | 214.30   | 0.092  | 306.92   | 0.64 | 270.71               | 0.14   | 3.14     | 0.0004 | 3.218168 | 0.0059* |
| <i>dMef2</i> RNAi 2         | 67                  | 85.29    | 0.52 | 256.51   | 0.0026 | 311.45   | 0.63 | 256.62               | 0.0049 | 2.71     | 0.6869 | 3.154226 | 0.0279* |
| <i>dTRAPPC9</i> control     | 66                  | 62.78    |      | 143.33   |        | 324.20   |      | 293.48               |        | 2.58     |        | 2.911718 |         |
| <i>dTRAPPC9</i> RNAi        | 68                  | 69.82    | 0.58 | 167.14   | 0.19   | 321.97   | 0.70 | 285.50               | 0.22   | 2.71     | 0.2250 | 3.121813 | 0.0660  |
| <b>Dopaminergic neurons</b> |                     |          |      |          |        |          |      |                      |        |          |        |          |         |
| <i>dMef2</i> control        | 132                 | 61.09    |      | 43.36    |        | 324.85   |      | 333.36               |        | 2.50     |        | 2.57905  |         |

|                          |                   |       |        |        |                        |        |       |        |                        |                         |          |                         |         |
|--------------------------|-------------------|-------|--------|--------|------------------------|--------|-------|--------|------------------------|-------------------------|----------|-------------------------|---------|
| <b>dMef2 RNAi</b>        | 185               | 65.74 | 0.57   | 121.43 | 1.8x10 <sup>-15*</sup> | 319.76 | 0.24  | 295.92 | 5.1x10 <sup>-15*</sup> | 3.11x10 <sup>-16*</sup> |          |                         |         |
| <b>dMef2 RNAi 1</b>      | 119               | 71.52 | 0.25   | 94.09  | 3.5x10 <sup>-09*</sup> | 316.65 | 0.086 | 309.90 | 5.7x10 <sup>-08</sup>  | 2.25x10 <sup>-10*</sup> | 2.170843 | 4.26x10 <sup>-12*</sup> |         |
| <b>dMef2 RNAi 2</b>      | 66                | 55.33 | 0.60   | 170.72 | 8.1x10 <sup>-10*</sup> | 325.37 | 0.93  | 270.72 | 8.6x10 <sup>-12*</sup> | 2.07x10 <sup>-14</sup>  | 2.00965  | 1.66x10 <sup>-11</sup>  |         |
| <b>dTRAPPC9 control</b>  | 84                | 62.54 |        | 49.22  |                        | 325.63 |       | 331.70 |                        | 2.90                    | 3.19955  |                         |         |
| <b>dTRAPPC9 RNAi</b>     | 79                | 31.06 | 0.0022 | 66.75  | 0.0931                 | 338.74 | 0.013 | 327.93 | 0.47                   | 2.76                    | 0.1183   | 3.391288                | 0.0233  |
|                          |                   |       | *      |        |                        |        | *     |        |                        |                         |          |                         |         |
| <b>Circadian neurons</b> |                   |       |        |        |                        |        |       |        |                        |                         |          |                         |         |
| <b>dMef2 control</b>     | <i>Not tested</i> |       |        |        |                        |        |       |        |                        |                         |          |                         |         |
| <b>dMef2 RNAi</b>        | <i>Not tested</i> |       |        |        |                        |        |       |        |                        |                         |          |                         |         |
| <b>dMef2 RNAi 1</b>      | <i>Not tested</i> |       |        |        |                        |        |       |        |                        |                         |          |                         |         |
| <b>dMef2 RNAi 2</b>      | <i>Not tested</i> |       |        |        |                        |        |       |        |                        |                         |          |                         |         |
| <b>dTRAPPC9 control</b>  | 56                | 58.30 |        | 83.22  |                        | 322.48 |       | 316.39 |                        | 2.97                    | 3.13789  | 9                       |         |
| <b>dTRAPPC9 RNAi</b>     | 53                | 71.22 | 0.19   | 193.96 | 4.2x10 <sup>-05</sup>  | 320.73 | 0.80  | 279.80 | 0.00022                | 3.21                    | 0.0405   | 3.53649                 | 0.0029* |

\*Welch correction was performed. RD=relative day. RN=relative night.

**TABLE S7.** Summary of results of functional characterization of *dMef2* and *dTRAPPC9* knockdown in *Drosophila* in constant darkness

|                             | Activity            |          |                         | Sleep    |                         |          |                         | Activity while awake |                         |          |                          |          |                          |
|-----------------------------|---------------------|----------|-------------------------|----------|-------------------------|----------|-------------------------|----------------------|-------------------------|----------|--------------------------|----------|--------------------------|
|                             | Number of flies (N) | Total RD | P                       | Total RN | P                       | Total RD | P                       | Total RN             | P                       | Total RD | P                        | Total RN | P                        |
| <b>Pan-neuronal</b>         |                     |          |                         |          |                         |          |                         |                      |                         |          |                          |          |                          |
| <i>dMef2</i> control        | 62                  | 164.99   |                         | 126.95   |                         | 269.14   |                         | 299.56               |                         | 2.41     |                          | 2.501068 |                          |
| <i>dMef2</i> RNAi           | 133                 | 188.18   | 0.17                    | 183.37   | 0.0088                  | 270.45   | 0.95                    | 271.17               | 0.00037*                | 2.71     | 0.0009                   | 2.773957 | 0.01001*                 |
| <i>dMef2</i> RNAi 1         | 67                  | 195.66   | 0.13                    | 183.03   | 0.023                   | 268.76   | 0.97                    | 272.25               | 0.0022                  | 2.75     | 0.0012                   | 2.773551 | 0.0214                   |
| <i>dMef2</i> RNAi 2         | 66                  | 180.58   | 0.39                    | 183.72   | 0.030                   | 272.16   | 0.74                    | 270.07               | 0.0047*                 | 2.66     | 0.0169                   | 2.774404 | 0.0169*                  |
| <i>dTRAPPC9</i> control     | 66                  | 164.47   |                         | 104.77   |                         | 269.70   |                         | 306.25               |                         | 2.48     |                          | 2.469804 |                          |
| <i>dTRAPPC9</i> RNAi        | 66                  | 176.08   | 0.56                    | 110.72   | 0.72                    | 269.99   | 0.72*                   | 299.15               | 0.35*                   | 2.66     | 0.1155                   | 2.588258 | 0.2754                   |
| <b>Dopaminergic neurons</b> |                     |          |                         |          |                         |          |                         |                      |                         |          |                          |          |                          |
| <i>dMef2</i> control        | 128                 | 135.52   |                         | 22.63    |                         | 294.56   |                         | 346.07               |                         | 2.78     |                          | 2.744557 |                          |
| <i>dMef2</i> RNAi           | 173                 | 200.79   | 4.5x10 <sup>-07</sup> * | 99.08    | 1.6x10 <sup>-17</sup> * | 239.79   | 2.6x10 <sup>-17</sup> * | 294.47               | 9.5x10 <sup>-26</sup> * | 2.18     | 2.04x10 <sup>-16</sup> * | 2.169431 | 9.88x10 <sup>-14</sup> * |
| <i>dMef2</i> RNAi 1         | 112                 | 190.39   | 8.5x10 <sup>-05</sup> * | 86.06    | 5.5x10 <sup>-13</sup> * | 246.57   | 1.0x10 <sup>-11</sup> * | 301.43               | 8.7x10 <sup>-17</sup> * | 2.22     | 3.14x10 <sup>-13</sup> * | 2.186388 | 9x10 <sup>-12</sup> *    |
| <i>dMef2</i> RNAi 2         | 61                  | 219.88   | 0.00016*                | 122.98   | 1.4x10 <sup>-07</sup> * | 227.34   | 8.9x10 <sup>-09</sup> * | 281.69               | 2.1x10 <sup>-11</sup> * | 2.11     | 5.93x10 <sup>-11</sup>   | 2.140733 | 2.27x10 <sup>-8</sup>    |
| <i>dTRAPPC9</i> control     | 83                  | 145.91   |                         | 21.78    |                         | 289.57   |                         | 345.81               |                         | 2.76     |                          | 2.641114 |                          |
| <i>dTRAPPC9</i> RNAi        | 78                  | 127.61   | 0.23                    | 40.35    | 0.012*                  | 303.54   | 0.030*                  | 336.82               | 0.015*                  | 2.87     | 0.0695                   | 2.688091 | 0.6042                   |
| <b>Circadian neurons</b>    |                     |          |                         |          |                         |          |                         |                      |                         |          |                          |          |                          |
| <i>dMef2</i> control        | Not tested          |          |                         |          |                         |          |                         |                      |                         |          |                          |          |                          |
| <i>dMef2</i> RNAi           | Not tested          |          |                         |          |                         |          |                         |                      |                         |          |                          |          |                          |
| <i>dMef2</i> RNAi 1         | Not tested          |          |                         |          |                         |          |                         |                      |                         |          |                          |          |                          |
| <i>dMef2</i> RNAi 2         | Not tested          |          |                         |          |                         |          |                         |                      |                         |          |                          |          |                          |

|                                |    |        |       |        |         |        |      |        |       |      |                       |         |                      |
|--------------------------------|----|--------|-------|--------|---------|--------|------|--------|-------|------|-----------------------|---------|----------------------|
| <b><i>dTRAPPC9</i> control</b> | 55 | 149.22 |       | 69.96  |         | 278.91 |      | 311.48 |       |      | 2.39                  | 9       | 2.29206              |
| <b><i>dTRAPPC9</i> RNAi</b>    | 53 | 206.00 | 0.067 | 157.03 | 0.00017 | 272.45 | 0.62 | 283.35 | 0.011 |      | 6.63x10 <sup>-7</sup> | 2.88829 | 5.5x10 <sup>-7</sup> |
|                                |    |        |       |        |         |        |      |        |       | 2.99 | <sup>7</sup>          | 4       |                      |

\*Welch correction was performed. RD=relative day. RN=relative night.

## REFERENCES

1. Galesloot TE, Vermeulen SH, Swinkels DW, de Vegt F, Franke B, den Heijer M, et al. Cohort Profile: The Nijmegen Biomedical Study (NBS). *International journal of epidemiology*. 2017;46(4):1099-100j.
2. Sandra Kooij JJ, Marije Boonstra A, Swinkels SH, Bekker EM, de Noord I, Buitelaar JK. Reliability, validity, and utility of instruments for self-report and informant report concerning symptoms of ADHD in adult patients. *Journal of attention disorders*. 2008;11(4):445-58.
3. Genomes Project C, Abecasis GR, Altshuler D, Auton A, Brooks LD, Durbin RM, et al. A map of human genome variation from population-scale sequencing. *Nature*. 2010;467(7319):1061-73.
4. Sudmant PH, Rausch T, Gardner EJ, Handsaker RE, Abyzov A, Huddleston J, et al. An integrated map of structural variation in 2,504 human genomes. *Nature*. 2015;526(7571):75-81.
5. Loh PR, Danecek P, Palamara PF, Fuchsberger C, Y AR, H KF, et al. Reference-based phasing using the Haplotype Reference Consortium panel. *Nature genetics*. 2016;48(11):1443-8.
6. Das S, Forer L, Schonherr S, Sidore C, Locke AE, Kwong A, et al. Next-generation genotype imputation service and methods. *Nature genetics*. 2016;48(10):1284-7.
7. Chang CC, Chow CC, Tellier LC, Vattikuti S, Purcell SM, Lee JJ. Second-generation PLINK: rising to the challenge of larger and richer datasets. *GigaScience*. 2015;4:7.
8. Purcell S, Neale B, Todd-Brown K, Thomas L, Ferreira MA, Bender D, et al. PLINK: a tool set for whole-genome association and population-based linkage analyses. *American journal of human genetics*. 2007;81(3):559-75.
9. Galinsky KJ, Bhatia G, Loh PR, Georgiev S, Mukherjee S, Patterson NJ, et al. Fast Principal-Component Analysis Reveals Convergent Evolution of ADH1B in Europe and East Asia. *American journal of human genetics*. 2016;98(3):456-72.
10. Price AL, Patterson NJ, Plenge RM, Weinblatt ME, Shadick NA, Reich D. Principal components analysis corrects for stratification in genome-wide association studies. *Nature genetics*. 2006;38(8):904-9.
11. Kent WJ, Sugnet CW, Furey TS, Roskin KM, Pringle TH, Zahler AM, et al. The human genome browser at UCSC. *Genome research*. 2002;12(6):996-1006.
12. Li MX, Sham PC, Cherny SS, Song YQ. A knowledge-based weighting framework to boost the power of genome-wide association studies. *PloS one*. 2010;5(12):e14480.
13. Li MX, Kwan JS, Sham PC. HYST: a hybrid set-based test for genome-wide association studies, with application to protein-protein interaction-based association analysis. *American journal of human genetics*. 2012;91(3):478-88.



14. Guadalupe T, Zwiers MP, Teumer A, Wittfeld K, Vasquez AA, Hoogman M, et al. Measurement and genetics of human subcortical and hippocampal asymmetries in large datasets. *Human brain mapping*. 2014;35(7):3277-89.
15. de Leeuw CA, Mooij JM, Heskes T, Posthuma D. MAGMA: generalized gene-set analysis of GWAS data. *PLoS computational biology*. 2015;11(4):e1004219.
16. Schindelin J, Arganda-Carreras I, Frise E, Kaynig V, Longair M, Pietzsch T, et al. Fiji: an open-source platform for biological-image analysis. *Nature methods*. 2012;9(7):676-82.
17. Clark RI, Tan SW, Pean CB, Roostalu U, Vivancos V, Bronda K, et al. MEF2 is an in vivo immune-metabolic switch. *Cell*. 2013;155(2):435-47.
18. Chen Z, Liang S, Zhao Y, Han Z. miR-92b regulates Mef2 levels through a negative-feedback circuit during *Drosophila* muscle development. *Development (Cambridge, England)*. 2012;139(19):3543-52.
19. Bryantsev AL, Baker PW, Lovato TL, Jaramillo MS, Cripps RM. Differential requirements for Myocyte Enhancer Factor-2 during adult myogenesis in *Drosophila*. *Developmental biology*. 2012;361(2):191-207.
20. Blanchard FJ, Collins B, Cyran SA, Hancock DH, Taylor MV, Blau J. The transcription factor Mef2 is required for normal circadian behavior in *Drosophila*. *The Journal of neuroscience : the official journal of the Society for Neuroscience*. 2010;30(17):5855-65.
21. Pfaffl MW. A new mathematical model for relative quantification in real-time RT-PCR. *Nucleic acids research*. 2001;29(9):e45.
22. Navarro JA, Hessner S, Yeniseti SC, Bayersdorfer F, Zhang L, Voigt A, et al. Analysis of dopaminergic neuronal dysfunction in genetic and toxin-induced models of Parkinson's disease in *Drosophila*. *J Neurochem*. 2014;131(3):369-82.
23. Johard HA, Yoishii T, Dircksen H, Cusumano P, Rouyer F, Helfrich-Forster C, et al. Peptidergic clock neurons in *Drosophila*: ion transport peptide and short neuropeptide F in subsets of dorsal and ventral lateral neurons. *J Comp Neurol*. 2009;516(1):59-73.
24. Davie K, Janssens J, Koldere D, De Waegeneer M, Pech U, Kreft L, et al. A Single-Cell Transcriptome Atlas of the Aging *Drosophila* Brain. *Cell*. 2018;174(4):982-98.e20.
25. Crittenden JR, Skoulakis EMC, Goldstein ES, Davis RL. *Drosophila mef2* is essential for normal mushroom body and wing development. *Biology Open*. 2018;7(9):bio035618.
26. Noveen A, Daniel A, Hartenstein V. Early development of the *Drosophila* mushroom body: the roles of *eyeless* and *dachshund*. *Development (Cambridge, England)*. 2000;127(16):3475-88.
27. Schulz RA, Chromey C, Lu MF, Zhao B, Olson EN. Expression of the D-MEF2 transcription in the *Drosophila* brain suggests a role in neuronal cell differentiation. *Oncogene*. 1996;12(8):1827-31.

28. Stergiakouli E, Hamshere M, Holmans P, Langley K, Zaharieva I, de CG, et al. Investigating the contribution of common genetic variants to the risk and pathogenesis of ADHD. *The American journal of psychiatry*. 2012;169(2):186-94.
29. Yang L, Neale BM, Liu L, Lee SH, Wray NR, Ji N, et al. Polygenic transmission and complex neuro developmental network for attention deficit hyperactivity disorder: genome-wide association study of both common and rare variants. *American journal of medical genetics Part B, Neuropsychiatric genetics : the official publication of the International Society of Psychiatric Genetics*. 2013;162B(5):419-30.
30. Elia J, Gai X, Xie HM, Perin JC, Geiger E, Glessner JT, et al. Rare structural variants found in attention-deficit hyperactivity disorder are preferentially associated with neurodevelopmental genes. *Molecular psychiatry*. 2010;15(6):637-46.
31. Hinney A, Scherag A, Jarick I, Albayrak O, Putter C, Pechlivanis S, et al. Genome-wide association study in German patients with attention deficit/hyperactivity disorder. *American journal of medical genetics Part B, Neuropsychiatric genetics : the official publication of the International Society of Psychiatric Genetics*. 2011;156B(8):888-97.
32. Lionel AC, Crosbie J, Barbosa N, Goodale T, Thiruvahindrapuram B, Rickaby J, et al. Rare copy number variation discovery and cross-disorder comparisons identify risk genes for ADHD. *Science translational medicine*. 2011;3(95):95ra75.
33. Neale BM, Lasky-Su J, Anney R, Franke B, Zhou K, Maller JB, et al. Genome-wide association scan of attention deficit hyperactivity disorder. *American Journal of Medical Genetics Part B: Neuropsychiatric Genetics*. 2008;147(8):1337-44.
34. Neale BM, Medland S, Ripke S, Anney RJ, Asherson P, Buitelaar J, et al. Case-control genome-wide association study of attention-deficit/hyperactivity disorder. *Journal of the American Academy of Child & Adolescent Psychiatry*. 2010;49(9):906-20.
35. Mick E, Todorov A, Smalley S, Hu X, Loo S, Todd RD, et al. Family-based genome-wide association scan of attention-deficit/hyperactivity disorder. *Journal of the American Academy of Child and Adolescent Psychiatry*. 2010;49(9):898-905 e3.
36. Sanchez-Mora C, Ramos-Quiroga JA, Bosch R, Corrales M, Garcia-Martinez I, Nogueira M, et al. Case-Control Genome-Wide Association Study of Persistent Attention-Deficit Hyperactivity Disorder Identifies FBXO33 as a Novel Susceptibility Gene for the Disorder. *Neuropsychopharmacology : official publication of the American College of Neuropsychopharmacology*. 2014.
