# Supplementary material for: Contribution of Intellectual Disability–Related Genes to ADHD Risk and to Locomotor Activity in Drosophila
Source: Atypon-hosted journal article supplement (doi:10.1176/appi.ajp.2019.18050599), 2020-02-12
Supplement: appi.ajp.2019.18050599.ds002_tables2.pdf [file appi.ajp.2019.18050599.ds002_tables2.pdf]

**TABLE S2.** ID gene panel listing 490 candidate genes for ID

| <b>Gene</b>    | <b>Chr</b> | <b>Omim disease</b>                                                                   |
|----------------|------------|---------------------------------------------------------------------------------------|
| <i>ADAR</i>    | 1          | Aicardi-Goutieres syndrome 6                                                          |
| <i>ADCK3</i>   | 1          | -                                                                                     |
| <i>AKT3</i>    | 1          | Megalencephaly-polymicrogyria-polydactyly-hydrocephalus syndrome                      |
| <i>ALG6</i>    | 1          | Congenital disorder of glycosylation type Ic                                          |
| <i>AP4B1</i>   | 1          | Spastic paraplegia 47 autosomal recessive                                             |
| <i>ARID1A</i>  | 1          | Mental retardation autosomal dominant 14                                              |
| <i>ASPM</i>    | 1          | Microcephaly 5 primary autosomal recessive                                            |
| <i>ATP1A2</i>  | 1          | Alternating hemiplegia of childhood                                                   |
| <i>DARS2</i>   | 1          | Leukoencephalopathy with brain stem and spinal cord involvement and lactate elevation |
| <i>DBT</i>     | 1          | Maple syrup urine disease type II                                                     |
| <i>DHCR24</i>  | 1          | Desmosterolosis                                                                       |
| <i>DPYD</i>    | 1          | 5-fluorouracil toxicity                                                               |
| <i>FH</i>      | 1          | Fumarase deficiency                                                                   |
| <i>FUCA1</i>   | 1          | Fucosidosis                                                                           |
| <i>GALE</i>    | 1          | Galactose epimerase deficiency                                                        |
| <i>GATAD2B</i> | 1          | Mental retardation autosomal dominant 18                                              |
| <i>GJC2</i>    | 1          | Leukodystrophy hypomyelinating 2                                                      |
| <i>GNPAT</i>   | 1          | Chondrodysplasia punctata rhizomelic type 2                                           |
| <i>HAX1</i>    | 1          | Neutropenia severe congenital 3 autosomal recessive                                   |
| <i>MMACHC</i>  | 1          | Methylmalonic aciduria and homocystinuria cblC type                                   |
| <i>MTR</i>     | 1          | Homocystinuria-megaloblastic anemia cblG complementation type                         |
| <i>NDUFS2</i>  | 1          | Mitochondrial complex I deficiency                                                    |
| <i>NLRP3</i>   | 1          | CINCA syndrome                                                                        |
| <i>NTRK1</i>   | 1          | Insensitivity to pain congenital with anhidrosis                                      |

|                 |   |                                                                                          |
|-----------------|---|------------------------------------------------------------------------------------------|
| <i>ORC1</i>     | 1 | Meier-Gorlin syndrome 1                                                                  |
| <i>PEX10</i>    | 1 | Peroxisome biogenesis disorder 6A (Zellweger)                                            |
| <i>PEX11B</i>   | 1 | Peroxisome biogenesis disorder 14B                                                       |
| <i>PHGDH</i>    | 1 | Phosphoglycerate dehydrogenase deficiency                                                |
| <i>PIGV</i>     | 1 | Hyperphosphatasia with mental retardation syndrome 1                                     |
| <i>POMGNT1</i>  | 1 | Muscular dystrophy-dystroglycanopathy (congenital with brain and eye anomalies) type A 3 |
| <i>PPOX</i>     | 1 | Porphyria variegata                                                                      |
| <i>RAB3GAP2</i> | 1 | Martsof syndrome                                                                         |
| <i>SKI</i>      | 1 | Shprintzen-Goldberg syndrome                                                             |
| <i>SLC2A1</i>   | 1 | Dystonia 9                                                                               |
| <i>ST3GAL3</i>  | 1 | Epileptic encephalopathy early infantile 15                                              |
| <i>STIL</i>     | 1 | Microcephaly 7 primary autosomal recessive                                               |
| <i>SYT14</i>    | 1 | Spinocerebellar ataxia autosomal recessive 11                                            |
| <i>TBCE</i>     | 1 | Hypoparathyroidism-retardation-dysmorphism syndrome                                      |
| <i>TMCO1</i>    | 1 | Craniofacial dysmorphism skeletal anomalies and mental retardation syndrome              |
| <i>ACVR1</i>    | 2 | Fibrodysplasia ossificans progressiva                                                    |
| <i>BBS5</i>     | 2 | Bardet-Biedl syndrome 5                                                                  |
| <i>BCS1L</i>    | 2 | Bjornstad syndrome                                                                       |
| <i>COLEC11</i>  | 2 | 3MC syndrome 2                                                                           |
| <i>D2HGDH</i>   | 2 | D-2-hydroxyglutaric aciduria                                                             |
| <i>EIF2AK3</i>  | 2 | Wolcott-Rallison syndrome                                                                |
| <i>ERCC3</i>    | 2 | Trichothiodystrophy                                                                      |
| <i>GAD1</i>     | 2 | Cerebral palsy spastic quadriplegic 1                                                    |
| <i>GLI2</i>     | 2 | Holoprosencephaly-9                                                                      |
| <i>HDAC4</i>    | 2 | Brachydactyly-mental retardation syndrome                                                |
| <i>LRP2</i>     | 2 | Donnai-Barrow syndrome                                                                   |
| <i>LRPPRC</i>   | 2 | Leigh syndrome French-Canadian type                                                      |
| <i>MBD5</i>     | 2 | Mental retardation autosomal dominant 1                                                  |
| <i>MMADHC</i>   | 2 | -                                                                                        |
| <i>MYCN</i>     | 2 | Feingold syndrome                                                                        |
| <i>NDUFS1</i>   | 2 | Mitochondrial complex I deficiency                                                       |

|                 |   |                                                                    |
|-----------------|---|--------------------------------------------------------------------|
| <i>NPHP1</i>    | 2 | Joubert syndrome 4                                                 |
| <i>NRXN1</i>    | 2 | Pitt-Hopkins-like syndrome 2                                       |
| <i>PEX13</i>    | 2 | Peroxisome biogenesis disorder 11A (Zellweger)                     |
| <i>RAB3GAP1</i> | 2 | Warburg micro syndrome 1                                           |
| <i>SATB2</i>    | 2 | Cleft palate and mental retardation                                |
| <i>SCN1A</i>    | 2 | Dravet syndrome                                                    |
| <i>SCN2A</i>    | 2 | Epileptic encephalopathy early infantile 11                        |
| <i>SIX3</i>     | 2 | Holoprosencephaly-2                                                |
| <i>SOS1</i>     | 2 | Fibromatosis gingival                                              |
| <i>TMEM237</i>  | 2 | Joubert syndrome 14                                                |
| <i>ZEB2</i>     | 2 | Mowat-Wilson syndrome                                              |
| <i>ABHD5</i>    | 3 | Chanarin-Dorfman syndrome                                          |
| <i>ACAD9</i>    | 3 | ACAD9 deficiency                                                   |
| <i>ALG3</i>     | 3 | Congenital disorder of glycosylation type Id                       |
| <i>AMT</i>      | 3 | Glycine encephalopathy                                             |
| <i>ANO10</i>    | 3 | Spinocerebellar ataxia autosomal recessive 10                      |
| <i>ARL13B</i>   | 3 | Joubert syndrome 8                                                 |
| <i>ARL6</i>     | 3 | Bardet-Biedl syndrome 3                                            |
| <i>ATR</i>      | 3 | Cutaneous telangiectasia and cancer syndrome familial              |
| <i>CRBN</i>     | 3 | Mental retardation autosomal recessive 2                           |
| <i>CTNNB1</i>   | 3 | Colorectal cancer somatic                                          |
| <i>DNAJC19</i>  | 3 | 3-methylglutaconic aciduria type V                                 |
| <i>FANCD2</i>   | 3 | Fanconi anemia complementation group D2                            |
| <i>FOXP1</i>    | 3 | Mental retardation with language impairment and autistic features  |
| <i>HESX1</i>    | 3 | Growth hormone deficiency with pituitary anomalies                 |
| <i>MCCC1</i>    | 3 | 3-Methylcrotonyl-CoA carboxylase 1 deficiency                      |
| <i>MRPS22</i>   | 3 | Combined oxidative phosphorylation deficiency 5                    |
| <i>POC1A</i>    | 3 | Short stature onychodysplasia facial dysmorphism and hypotrichosis |
| <i>RAF1</i>     | 3 | LEOPARD syndrome 2                                                 |
| <i>RFT1</i>     | 3 | Congenital disorder of glycosylation type In                       |
| <i>SLC33A1</i>  | 3 | Congenital cataracts hearing loss and neurodegeneration            |
| <i>SOX2-OT</i>  | 3 | -                                                                  |

|                |   |                                                                                                                    |
|----------------|---|--------------------------------------------------------------------------------------------------------------------|
| <i>TGFBR2</i>  | 3 | Colorectal cancer hereditary nonpolyposis type 6                                                                   |
| <i>THRB</i>    | 3 | Thyroid hormone resistance                                                                                         |
| <i>TREX1</i>   | 3 | Aicardi-Goutieres syndrome 1 dominant and recessive                                                                |
| <i>AGA</i>     | 4 | Aspartylglucosaminuria                                                                                             |
| <i>AIMP1</i>   | 4 | Leukodystrophy hypomyelinating 3                                                                                   |
| <i>BBS12</i>   | 4 | Bardet-Biedl syndrome 12                                                                                           |
| <i>BBS7</i>    | 4 | Bardet-Biedl syndrome 7                                                                                            |
| <i>CC2D2A</i>  | 4 | COACH syndrome                                                                                                     |
| <i>CEP135</i>  | 4 | Microcephaly 8 primary autosomal recessive                                                                         |
| <i>COQ2</i>    | 4 | Coenzyme Q10 deficiency primary 1                                                                                  |
| <i>FGFR3</i>   | 4 | Achondroplasia                                                                                                     |
| <i>FRAS1</i>   | 4 | Fraser syndrome                                                                                                    |
| <i>IDUA</i>    | 4 | Mucopolysaccharidosis Ih                                                                                           |
| <i>LARP7</i>   | 4 | Alazami syndrome                                                                                                   |
| <i>MANBA</i>   | 4 | Mannosidosis beta                                                                                                  |
| <i>MMAA</i>    | 4 | Methylmalonic aciduria vitamin B12-responsive                                                                      |
| <i>PRSS12</i>  | 4 | Mental retardation autosomal recessive 1                                                                           |
| <i>SLC4A4</i>  | 4 | Renal tubular acidosis proximal with ocular abnormalities                                                          |
| <i>SRD5A3</i>  | 4 | Congenital disorder of glycosylation type Iq                                                                       |
| <i>TMEM165</i> | 4 | Congenital disorder of glycosylation type IIk                                                                      |
| <i>ANKH</i>    | 5 | Chondrocalcinosis 2                                                                                                |
| <i>AP3B1</i>   | 5 | Hermansky-Pudlak syndrome 2                                                                                        |
| <i>B4GALT7</i> | 5 | Ehlers-Danlos syndrome progeroid type 1                                                                            |
| <i>C5orf42</i> | 5 | Joubert syndrome 17                                                                                                |
| <i>DHFR</i>    | 5 | Megaloblastic anemia due to dihydrofolate reductase deficiency                                                     |
| <i>ERCC8</i>   | 5 | Cockayne syndrome type A                                                                                           |
| <i>MCCC2</i>   | 5 | 3-Methylcrotonyl-CoA carboxylase 2 deficiency<br>Mental retardation stereotypic movements epilepsy and/or cerebral |
| <i>MEF2C</i>   | 5 | malformations                                                                                                      |
| <i>MOCS2</i>   | 5 | Molybdenum cofactor deficiency type B                                                                              |
| <i>MTRR</i>    | 5 | Homocystinuria-megaloblastic anemia cbl E type                                                                     |
| <i>NDUFS4</i>  | 5 | Leigh syndrome                                                                                                     |

|                |   |                                                                                  |
|----------------|---|----------------------------------------------------------------------------------|
| <i>NIPBL</i>   | 5 | Cornelia de Lange syndrome 1                                                     |
| <i>NSD1</i>    | 5 | Beckwith-Wiedemann syndrome                                                      |
| <i>NSUN2</i>   | 5 | Mental retardation autosomal recessive 5                                         |
| <i>OCLN</i>    | 5 | Band-like calcification with simplified gyration and polymicrogyria              |
| <i>SDHA</i>    | 5 | Cardiomyopathy dilated 1GG                                                       |
| <i>SIL1</i>    | 5 | Marinesco-Sjogren syndrome                                                       |
| <i>AHI1</i>    | 6 | Joubert syndrome-3                                                               |
| <i>ALDH5A1</i> | 6 | Succinic semialdehyde dehydrogenase deficiency                                   |
| <i>ARID1B</i>  | 6 | Mental retardation autosomal dominant 12                                         |
| <i>BCKDHB</i>  | 6 | Maple syrup urine disease type 1b                                                |
| <i>ELOVL4</i>  | 6 | Ichthyosis spastic quadriplegia and mental retardation                           |
| <i>GRIK2</i>   | 6 | Mental retardation autosomal recessive 6                                         |
| <i>GTF2H5</i>  | 6 | Trichothiodystrophy complementation group A                                      |
| <i>LAMA2</i>   | 6 | Muscular dystrophy congenital merosin-deficient                                  |
| <i>MED23</i>   | 6 | Mental retardation autosomal recessive 18                                        |
| <i>MOCS1</i>   | 6 | Molybdenum cofactor deficiency type A                                            |
| <i>MUT</i>     | 6 | Methylmalonic aciduria mut(0) type                                               |
| <i>NEU1</i>    | 6 | Sialidosis type I                                                                |
| <i>PDSS2</i>   | 6 | Coenzyme Q10 deficiency primary 3                                                |
| <i>PEX7</i>    | 6 | Peroxisome biogenesis disorder 9B                                                |
| <i>RARS2</i>   | 6 | Pontocerebellar hypoplasia type 6                                                |
| <i>RMND1</i>   | 6 | Combined oxidative phosphorylation deficiency 11                                 |
| <i>SERAC1</i>  | 6 | 3-methylglutaconic aciduria with deafness encephalopathy and Leigh-like syndrome |
| <i>SLC17A5</i> | 6 | Salla disease                                                                    |
| <i>SOBP</i>    | 6 | Mental retardation anterior maxillary protrusion and strabismus                  |
| <i>SYNGAP1</i> | 6 | Mental retardation autosomal dominant 5                                          |
| <i>TUBB2B</i>  | 6 | Polymicrogyria symmetric or asymmetric                                           |
| <i>ACTB</i>    | 7 | Baraitser-Winter syndrome 1                                                      |
| <i>ASL</i>     | 7 | Argininosuccinic aciduria                                                        |
| <i>BBS9</i>    | 7 | Bardet-Biedl syndrome 9                                                          |
| <i>BRAF</i>    | 7 | Adenocarcinoma of lung somatic                                                   |

|                |   |                                                                           |
|----------------|---|---------------------------------------------------------------------------|
| <i>CEP41</i>   | 7 | Joubert syndrome 15                                                       |
| <i>CNTNAP2</i> | 7 | Cortical dysplasia-focal epilepsy syndrome                                |
| <i>DLD</i>     | 7 | Dihydrolipoamide dehydrogenase deficiency                                 |
| <i>GLI3</i>    | 7 | Greig cephalopolysyndactyly syndrome                                      |
| <i>GUSB</i>    | 7 | Mucopolysaccharidosis VII                                                 |
| <i>HOXA1</i>   | 7 | Athabaskan brainstem dysgenesis syndrome                                  |
|                |   | Muscular dystrophy-dystroglycanopathy (congenital with brain and eye      |
| <i>ISPD</i>    | 7 | anomalies) type A 7                                                       |
| <i>KCTD7</i>   | 7 | Epilepsy progressive myoclonic 3 with or without intracellular inclusions |
| <i>PEX1</i>    | 7 | Peroxisome biogenesis disorder 1A (Zellweger)                             |
| <i>RBM28</i>   | 7 | Alopecia neurologic defects and endocrinopathy syndrome                   |
| <i>RELN</i>    | 7 | Lissencephaly 2 (Norman-Roberts type)                                     |
| <i>SHH</i>     | 7 | Holoprosencephaly-3                                                       |
| <i>CA2</i>     | 8 | Osteopetrosis autosomal recessive 3 with renal tubular acidosis           |
| <i>CHD7</i>    | 8 | CHARGE syndrome                                                           |
| <i>DDHD2</i>   | 8 | Spastic paraplegia 54 autosomal recessive                                 |
| <i>ERLIN2</i>  | 8 | Spastic paraplegia 18 autosomal recessive                                 |
| <i>ESCO2</i>   | 8 | Roberts syndrome                                                          |
| <i>KCNK9</i>   | 8 | Birk-Barel mental retardation dysmorphism syndrome                        |
| <i>MCPH1</i>   | 8 | Microcephaly 1 primary autosomal recessive                                |
| <i>NBN</i>     | 8 | Leukemia, acute lymphoblastic                                             |
| <i>RAD21</i>   | 8 | Cornelia de Lange syndrome 4                                              |
| <i>TMEM67</i>  | 8 | COACH syndrome                                                            |
| <i>TRAPPC9</i> | 8 | Mental retardation autosomal recessive 13                                 |
| <i>TUSC3</i>   | 8 | Mental retardation autosomal recessive 7                                  |
| <i>VPS13B</i>  | 8 | Cohen syndrome                                                            |
| <i>AGPAT2</i>  | 9 | Lipodystrophy congenital generalized type 1                               |
| <i>AK1</i>     | 9 | Hemolytic anemia due to adenylate kinase deficiency                       |
| <i>ALG2</i>    | 9 | Congenital disorder of glycosylation type II                              |
| <i>APTX</i>    | 9 | Ataxia early-onset with oculomotor apraxia and hypoalbuminemia            |
| <i>AUH</i>     | 9 | 3-methylglutaconic aciduria type I                                        |
| <i>B4GALT1</i> | 9 | Congenital disorder of glycosylation type IIb                             |

|                 |    |                                                                                          |
|-----------------|----|------------------------------------------------------------------------------------------|
| <i>CDK5RAP2</i> | 9  | Microcephaly 3 primary autosomal recessive                                               |
| <i>DOCK8</i>    | 9  | Hyper-IgE recurrent infection syndrome autosomal recessive                               |
| <i>EHMT1</i>    | 9  | Kleefstra syndrome                                                                       |
| <i>FKTN</i>     | 9  | Cardiomyopathy dilated 1X                                                                |
| <i>GALT</i>     | 9  | Galactosemia                                                                             |
| <i>GLDC</i>     | 9  | Glycine encephalopathy                                                                   |
| <i>GRIN1</i>    | 9  | Mental retardation autosomal dominant 8                                                  |
| <i>INPP5E</i>   | 9  | Joubert syndrome 1                                                                       |
| <i>KCNT1</i>    | 9  | Epilepsy nocturnal frontal lobe 5                                                        |
| <i>LAMC3</i>    | 9  | Cortical malformations occipital                                                         |
| <i>MAN1B1</i>   | 9  | Mental retardation autosomal recessive 15                                                |
| <i>PIGO</i>     | 9  | Hyperphosphatasia with mental retardation syndrome 2                                     |
| <i>POMT1</i>    | 9  | Muscular dystrophy-dystroglycanopathy (congenital with brain and eye anomalies) type A 1 |
| <i>PTCH1</i>    | 9  | Basal cell carcinoma somatic                                                             |
| <i>SMARCA2</i>  | 9  | Nicolaides-Baraitser syndrome                                                            |
| <i>STXBP1</i>   | 9  | Epileptic encephalopathy early infantile 4                                               |
| <i>SURF1</i>    | 9  | Leigh syndrome due to COX deficiency                                                     |
| <i>TGFBR1</i>   | 9  | Loeys-Dietz syndrome type 1A                                                             |
| <i>TSC1</i>     | 9  | Focal cortical dysplasia Taylor balloon cell type                                        |
| <i>VLDLR</i>    | 9  | Cerebellar hypoplasia and mental retardation with or without quadrupedal locomotion 1    |
| <i>XPA</i>      | 9  | Xeroderma pigmentosum group A                                                            |
| <i>ALDH18A1</i> | 10 | Cutis laxa autosomal recessive type IIIA                                                 |
| <i>COX15</i>    | 10 | Cardioencephalomyopathy fatal infantile due to cytochrome c oxidase deficiency 2         |
| <i>DHTKD1</i>   | 10 | 2-aminoadipic 2-oxoadipic aciduria                                                       |
| <i>EMX2</i>     | 10 | Schizencephaly                                                                           |
| <i>ERCC6</i>    | 10 | Cerebrooculofacioskeletal syndrome 1                                                     |
| <i>FGFR2</i>    | 10 | Antley-Bixler syndrome without genital anomalies or disordered steroidogenesis           |
| <i>KAT6B</i>    | 10 | Genitopatellar syndrome                                                                  |
| <i>KIAA1279</i> | 10 | Goldberg-Shprintzen megacolon syndrome                                                   |

|                 |    |                                                                                                                                                       |
|-----------------|----|-------------------------------------------------------------------------------------------------------------------------------------------------------|
| <i>KIF11</i>    | 10 | Microcephaly with or without chorioretinopathy lymphedema or mental retardation<br>Hypermethioninemia persistent autosomal dominant due to methionine |
| <i>MAT1A</i>    | 10 | adenosyltransferase I/III deficiency                                                                                                                  |
| <i>PDSS1</i>    | 10 | Coenzyme Q10 deficiency primary 2                                                                                                                     |
| <i>POLR3A</i>   | 10 | Leukodystrophy hypomyelinating 7 with or without oligodontia and/or hypogonadotropic hypogonadism                                                     |
| <i>PTEN</i>     | 10 | Bannayan-Riley-Ruvalcaba syndrome                                                                                                                     |
| <i>RAB18</i>    | 10 | Warburg micro syndrome 3                                                                                                                              |
| <i>SHOC2</i>    | 10 | Noonan-like syndrome with loose anagen hair                                                                                                           |
| <i>SMC3</i>     | 10 | -                                                                                                                                                     |
| <i>ALG9</i>     | 11 | Congenital disorder of glycosylation type II                                                                                                          |
| <i>BBS1</i>     | 11 | Bardet-Biedl syndrome 1                                                                                                                               |
| <i>BSCL2</i>    | 11 | Lipodystrophy congenital generalized type 2                                                                                                           |
| <i>CDON</i>     | 11 | Holoprosencephaly 11                                                                                                                                  |
| <i>DHCR7</i>    | 11 | Smith-Lemli-Opitz syndrome                                                                                                                            |
| <i>DPAGT1</i>   | 11 | Congenital disorder of glycosylation type Ij                                                                                                          |
| <i>HRAS</i>     | 11 | Congenital myopathy with excess of muscle spindles                                                                                                    |
| <i>JAM3</i>     | 11 | Hemorrhagic destruction of the brain subependymal calcification and cataracts                                                                         |
| <i>KCNJ11</i>   | 11 | Diabetes mellitus permanent neonatal with neurologic features                                                                                         |
| <i>KIRREL3</i>  | 11 | Mental retardation autosomal dominant 4                                                                                                               |
| <i>MED17</i>    | 11 | Microcephaly postnatal progressive with seizures and brain atrophy                                                                                    |
| <i>NDUFS3</i>   | 11 | Leigh syndrome due to mitochondrial complex I deficiency                                                                                              |
| <i>NDUFS8</i>   | 11 | Leigh syndrome due to mitochondrial complex I deficiency                                                                                              |
| <i>NDUFV1</i>   | 11 | Mitochondrial complex I deficiency                                                                                                                    |
| <i>PACS1</i>    | 11 | Mental retardation autosomal dominant 17                                                                                                              |
| <i>PAX6</i>     | 11 | Aniridia                                                                                                                                              |
| <i>PC</i>       | 11 | Pyruvate carboxylase deficiency                                                                                                                       |
| <i>PVRL1</i>    | 11 | -                                                                                                                                                     |
| <i>RNASEH2C</i> | 11 | Aicardi-Goutieres syndrome 3                                                                                                                          |
| <i>SLC25A22</i> | 11 | Epileptic encephalopathy early infantile 3                                                                                                            |
| <i>SLC35C1</i>  | 11 | Congenital disorder of glycosylation type IIc                                                                                                         |



|                 |    |                                                                                                   |
|-----------------|----|---------------------------------------------------------------------------------------------------|
| <i>SMPD1</i>    | 11 | Niemann-Pick disease type A                                                                       |
| <i>ABCC9</i>    | 12 | Atrial fibrillation familial 12                                                                   |
| <i>ATP2A2</i>   | 12 | Acrokeratosis verruciformis                                                                       |
| <i>ATP6V0A2</i> | 12 | Cutis laxa autosomal recessive type IIA                                                           |
| <i>BBS10</i>    | 12 | Bardet-Biedl syndrome 10                                                                          |
| <i>CACNA1C</i>  | 12 | Brugada syndrome 3                                                                                |
| <i>CEP290</i>   | 12 | Bardet-Biedl syndrome 14                                                                          |
| <i>DIP2B</i>    | 12 | Mental retardation FRA12A type                                                                    |
| <i>GNS</i>      | 12 | Mucopolysaccharidosis type IIID                                                                   |
| <i>GRIN2B</i>   | 12 | Mental retardation autosomal dominant 6                                                           |
| <i>HPD</i>      | 12 | Hawkinsinuria                                                                                     |
| <i>IGF1</i>     | 12 | Growth retardation with deafness and mental retardation due to IGF1 deficiency                    |
| <i>KRAS</i>     | 12 | Bladder cancer somatic                                                                            |
| <i>MVK</i>      | 12 | Hyper-IgD syndrome                                                                                |
| <i>NDUFA12</i>  | 12 | Leigh syndrome due to mitochondrial complex 1 deficiency                                          |
| <i>PEX5</i>     | 12 | Peroxisome biogenesis disorder 2A (Zellweger)                                                     |
| <i>POLR3B</i>   | 12 | Leukodystrophy hypomyelinating 8 with or without oligodontia and/or hypogonadotropic hypogonadism |
| <i>PTPN11</i>   | 12 | LEOPARD syndrome 1                                                                                |
| <i>PUS1</i>     | 12 | Mitochondrial myopathy and sideroblastic anemia 1                                                 |
| <i>SCN8A</i>    | 12 | Cognitive impairment with or without cerebellar ataxia                                            |
| <i>SUOX</i>     | 12 | Sulfite oxidase deficiency                                                                        |
| <i>TUBA1A</i>   | 12 | Lissencephaly 3                                                                                   |
| <i>B3GALTL</i>  | 13 | Peters-plus syndrome                                                                              |
| <i>BIVM-</i>    | 13 | -                                                                                                 |
| <i>ERCC5</i>    |    |                                                                                                   |
| <i>CENPJ</i>    | 13 | Microcephaly 6 primary autosomal recessive                                                        |
| <i>COL4A1</i>   | 13 | Angiopathy hereditary with nephropathy aneurysms and muscle                                       |
| <i>COL4A2</i>   | 13 | Porencephaly 2                                                                                    |
| <i>LIG4</i>     | 13 | LIG4 syndrome                                                                                     |
| <i>RNASEH2B</i> | 13 | Aicardi-Goutieres syndrome 2                                                                      |
| <i>SLC25A15</i> | 13 | Hyperornithinemia-hyperammonemia-homocitrullinemia syndrome                                       |

|                |    |                                                                                          |
|----------------|----|------------------------------------------------------------------------------------------|
| <i>ZIC2</i>    | 13 | Holoprosencephaly-5                                                                      |
| <i>ABCD4</i>   | 14 | Methylmalonic aciduria and homocystinuria cblJ type                                      |
| <i>AP4S1</i>   | 14 | Spastic paraplegia 52 autosomal recessive                                                |
| <i>DYNC1H1</i> | 14 | Charcot-Marie-Tooth disease axonal type 20                                               |
| <i>FOXP1</i>   | 14 | Rett syndrome congenital variant                                                         |
| <i>GCH1</i>    | 14 | Dystonia DOPA-responsive with or without hyperphenylalaninemia                           |
| <i>GPHN</i>    | 14 | Molybdenum cofactor deficiency type C                                                    |
| <i>L2HGDH</i>  | 14 | L-2-hydroxyglutaric aciduria                                                             |
| <i>MGAT2</i>   | 14 | Congenital disorder of glycosylation type IIa                                            |
| <i>NKX2-1</i>  | 14 | Chorea hereditary benign                                                                 |
| <i>PNP</i>     | 14 | Immunodeficiency due to purine nucleoside phosphorylase deficiency                       |
| <i>POMT2</i>   | 14 | Muscular dystrophy-dystroglycanopathy (congenital with brain and eye anomalies) type A 2 |
| <i>SMOC1</i>   | 14 | Microphthalmia with limb anomalies                                                       |
| <i>TTC8</i>    | 14 | Bardet-Biedl syndrome 8                                                                  |
| <i>AP4E1</i>   | 15 | Spastic paraplegia 51 autosomal recessive                                                |
| <i>BBS4</i>    | 15 | Bardet-Biedl syndrome 4                                                                  |
| <i>BLM</i>     | 15 | Bloom syndrome                                                                           |
| <i>BUB1B</i>   | 15 | Colorectal cancer somatic                                                                |
| <i>CEP152</i>  | 15 | Microcephaly 9 primary autosomal recessive                                               |
| <i>FBN1</i>    | 15 | Acromicric dysplasia                                                                     |
| <i>GATM</i>    | 15 | Cerebral creatine deficiency syndrome 3                                                  |
| <i>KIF7</i>    | 15 | Acrocallosal syndrome                                                                    |
| <i>MAP2K1</i>  | 15 | Cardiofaciocutaneous syndrome 3                                                          |
| <i>MYO5A</i>   | 15 | Griscelli syndrome type 1                                                                |
| <i>RAB27A</i>  | 15 | Griscelli syndrome type 2                                                                |
| <i>SLC12A6</i> | 15 | Agenesis of the corpus callosum with peripheral neuropathy                               |
| <i>SPRED1</i>  | 15 | Legius syndrome                                                                          |
| <i>STRA6</i>   | 15 | Microphthalmia isolated with coloboma 8                                                  |
| <i>UBE3A</i>   | 15 | Angelman syndrome                                                                        |
| <i>UBR1</i>    | 15 | Johanson-Blizzard syndrome                                                               |
| <i>ZNF592</i>  | 15 | Spinocerebellar ataxia autosomal recessive 5                                             |

|                 |    |                                                                      |
|-----------------|----|----------------------------------------------------------------------|
| <i>ACSF3</i>    | 16 | Combined malonic and methylmalonic aciduria                          |
| <i>ALG1</i>     | 16 | Congenital disorder of glycosylation type Ik                         |
| <i>ANKRD11</i>  | 16 | KBG syndrome                                                         |
| <i>BBS2</i>     | 16 | Bardet-Biedl syndrome 2                                              |
| <i>CCDC78</i>   | 16 | Myopathy centronuclear 4                                             |
| <i>CDH15</i>    | 16 | Mental retardation autosomal dominant 3                              |
| <i>COG7</i>     | 16 | Congenital disorder of glycosylation type IIe                        |
| <i>COG8</i>     | 16 | Congenital disorder of glycosylation type IIh                        |
| <i>CREBBP</i>   | 16 | Rubinstein-Taybi syndrome                                            |
| <i>FTO</i>      | 16 | Growth retardation developmental delay coarse facies and early death |
| <i>GCSH</i>     | 16 | Glycine encephalopathy                                               |
| <i>GPR56</i>    | 16 | Polymicrogyria bilateral frontoparietal                              |
| <i>GRIN2A</i>   | 16 | Epilepsy with neurodevelopmental defects                             |
| <i>MLYCD</i>    | 16 | Malonyl-CoA decarboxylase deficiency                                 |
| <i>NDE1</i>     | 16 | Lissencephaly 4 (with microcephaly)                                  |
| <i>PMM2</i>     | 16 | Congenital disorder of glycosylation type Ia                         |
| <i>ROGDI</i>    | 16 | Kohlschutter-Tonz syndrome                                           |
| <i>RPGRIP1L</i> | 16 | COACH syndrome                                                       |
| <i>SALL1</i>    | 16 | Townes-Brocks branchiootorenal-like syndrome                         |
| <i>SRCAP</i>    | 16 | Floating-Harbor syndrome                                             |
| <i>TAT</i>      | 16 | Tyrosinemia type II                                                  |
| <i>TBC1D24</i>  | 16 | Epileptic encephalopathy early infantile 16                          |
| <i>TMEM231</i>  | 16 | Joubert syndrome 20                                                  |
| <i>TSC2</i>     | 16 | Lymphangiomyomatosis somatic                                         |
| <i>ACOX1</i>    | 17 | Peroxisomal acyl-CoA oxidase deficiency                              |
| <i>ACTG1</i>    | 17 | Baraitser-Winter syndrome 2                                          |
| <i>ALDH3A2</i>  | 17 | Sjogren-Larsson syndrome                                             |
| <i>ASPA</i>     | 17 | Canavan disease                                                      |
| <i>COG1</i>     | 17 | Congenital disorder of glycosylation type IIg                        |
| <i>EFTUD2</i>   | 17 | Mandibulofacial dysostosis Guion-Almeida type                        |
| <i>GFAP</i>     | 17 | Alexander disease                                                    |
| <i>MPDU1</i>    | 17 | Congenital disorder of glycosylation type If                         |

|                 |    |                                                                                          |
|-----------------|----|------------------------------------------------------------------------------------------|
| <i>NAGLU</i>    | 17 | Mucopolysaccharidosis type IIIB (Sanfilippo B)                                           |
| <i>NF1</i>      | 17 | Leukemia juvenile myelomonocytic                                                         |
| <i>PAFAH1B1</i> | 17 | Lissencephaly 1                                                                          |
| <i>PYCR1</i>    | 17 | Cutis laxa autosomal recessive type IIB                                                  |
| <i>RAI1</i>     | 17 | Smith-Magenis syndrome                                                                   |
| <i>CCBE1</i>    | 18 | Hennekam lymphangiectasia-lymphedema syndrome                                            |
| <i>CTDP1</i>    | 18 | Congenital cataracts facial dysmorphism and neuropathy                                   |
| <i>DYM</i>      | 18 | Dyggve-Melchior-Clausen disease                                                          |
| <i>IER3IP1</i>  | 18 | Microcephaly epilepsy and diabetes syndrome                                              |
| <i>PIGN</i>     | 18 | Multiple congenital anomalies-hypotonia-seizures syndrome 1                              |
| <i>SETBP1</i>   | 18 | Schinzel-Giedion midface retraction syndrome                                             |
| <i>SMAD4</i>    | 18 | -                                                                                        |
| <i>TCF4</i>     | 18 | Pitt-Hopkins syndrome                                                                    |
| <i>TGIF1</i>    | 18 | -                                                                                        |
| <i>BCKDHA</i>   | 19 | Maple syrup urine disease type Ia                                                        |
| <i>CC2D1A</i>   | 19 | Mental retardation autosomal recessive 3                                                 |
| <i>DMPK</i>     | 19 | Myotonic dystrophy 1                                                                     |
| <i>ERCC2</i>    | 19 | Cerebrooculofacioskeletal syndrome 2                                                     |
| <i>ETHE1</i>    | 19 | Ethylmalonic encephalopathy                                                              |
| <i>FKRP</i>     | 19 | Muscular dystrophy-dystroglycanopathy (congenital with brain and eye anomalies) type A 5 |
| <i>GAMT</i>     | 19 | Cerebral creatine deficiency syndrome 2                                                  |
| <i>MAN2B1</i>   | 19 | Mannosidosis alpha- types I and II                                                       |
| <i>MAP2K2</i>   | 19 | Cardiofaciocutaneous syndrome 4                                                          |
| <i>MCOLN1</i>   | 19 | Mucopolipidosis IV                                                                       |
| <i>NDUFA11</i>  | 19 | Mitochondrial complex I deficiency                                                       |
| <i>NDUFS7</i>   | 19 | Leigh syndrome                                                                           |
| <i>PEPD</i>     | 19 | Prolidase deficiency                                                                     |
| <i>PIK3R2</i>   | 19 | Megalencephaly-polymicrogyria-polydactyly-hydrocephalus syndrome                         |
| <i>PNKP</i>     | 19 | Epileptic encephalopathy early infantile 10                                              |
| <i>RNASEH2A</i> | 19 | Aicardi-Goutieres syndrome 4                                                             |
| <i>SMARCA4</i>  | 19 | Mental retardation autosomal dominant 16                                                 |

|                |    |                                                                                          |
|----------------|----|------------------------------------------------------------------------------------------|
| <i>TECR</i>    | 19 | Mental retardation autosomal recessive 14                                                |
| <i>WDR62</i>   | 19 | Microcephaly 2 primary autosomal recessive with or without cortical malformations        |
| <i>AHCY</i>    | 20 | Hypermethioninemia with deficiency of S-adenosylhomocysteine hydrolase                   |
| <i>ARFGEF2</i> | 20 | Periventricular heterotopia with microcephaly                                            |
| <i>ASXL1</i>   | 20 | Bohring-Opitz syndrome                                                                   |
| <i>DNMT3B</i>  | 20 | Immunodeficiency-centromeric instability-facial anomalies syndrome 1                     |
| <i>DPM1</i>    | 20 | Congenital disorder of glycosylation type Ie                                             |
| <i>EPB41L1</i> | 20 | Mental retardation autosomal dominant 11                                                 |
| <i>GNAS</i>    | 20 | Acromegaly                                                                               |
| <i>GSS</i>     | 20 | Glutathione synthetase deficiency                                                        |
| <i>KCNQ2</i>   | 20 | Epileptic encephalopathy early infantile 7                                               |
| <i>MKKS</i>    | 20 | Bardet-Biedl syndrome 6                                                                  |
| <i>PANK2</i>   | 20 | HARP syndrome                                                                            |
| <i>PLCB1</i>   | 20 | Epileptic encephalopathy early infantile 12                                              |
| <i>CBS</i>     | 21 | Homocystinuria B6-responsive and nonresponsive types                                     |
| <i>DYRK1A</i>  | 21 | Mental retardation autosomal dominant 7                                                  |
| <i>HLCS</i>    | 21 | Holocarboxylase synthetase deficiency                                                    |
| <i>PCNT</i>    | 21 | Microcephalic osteodysplastic primordial dwarfism type II                                |
| <i>ACO2</i>    | 22 | Infantile cerebellar-retinal degeneration                                                |
| <i>ADSL</i>    | 22 | Adenylosuccinase deficiency                                                              |
| <i>ALG12</i>   | 22 | Congenital disorder of glycosylation type Ig                                             |
| <i>CACNG2</i>  | 22 | Mental retardation autosomal dominant 10                                                 |
| <i>CHKB-</i>   | 22 | -                                                                                        |
| <i>CPT1B</i>   |    |                                                                                          |
| <i>CYB5R3</i>  | 22 | Methemoglobinemia type I                                                                 |
| <i>EP300</i>   | 22 | Colorectal cancer somatic                                                                |
| <i>LARGE</i>   | 22 | Muscular dystrophy-dystroglycanopathy (congenital with brain and eye anomalies) type A 6 |
| <i>NAGA</i>    | 22 | Kanzaki disease                                                                          |
| <i>PEX26</i>   | 22 | Peroxisome biogenesis disorder 7A (Zellweger)                                            |
| <i>PRODH</i>   | 22 | Hyperprolinemia type I                                                                   |

|                |    |                                                                                  |
|----------------|----|----------------------------------------------------------------------------------|
| <i>SCO2</i>    | 22 | Cardioencephalomyopathy fatal infantile due to cytochrome c oxidase deficiency 1 |
| <i>SMARCB1</i> | 22 | Mental retardation autosomal dominant 15                                         |
| <i>SNAP29</i>  | 22 | Cerebral dysgenesis neuropathy ichthyosis and palmoplantar keratoderma syndrome  |
| <i>SOX10</i>   | 22 | PCWH syndrome                                                                    |
| <i>UPB1</i>    | 22 | Beta-ureidopropionase deficiency                                                 |
| <i>ABCD1</i>   | X  | Adrenoleukodystrophy                                                             |
| <i>ACSL4</i>   | X  | Mental retardation X-linked 63                                                   |
| <i>AFF2</i>    | X  | Mental retardation X-linked FRAXE type                                           |
| <i>AGTR2</i>   | X  | Mental retardation X-linked 88                                                   |
| <i>AIFM1</i>   | X  | Combined oxidative phosphorylation deficiency 6                                  |
| <i>AP1S2</i>   | X  | Mental retardation X-linked syndromic Fried type                                 |
| <i>ARHGEF6</i> | X  | Mental retardation X-linked 46                                                   |
| <i>ARHGEF9</i> | X  | Epileptic encephalopathy early infantile 8                                       |
| <i>ARX</i>     | X  | Epileptic encephalopathy early infantile 1                                       |
| <i>ATP6AP2</i> | X  | Mental retardation X-linked with epilepsy                                        |
| <i>ATP7A</i>   | X  | Menkes disease                                                                   |
| <i>ATRX</i>    | X  | Alpha-thalassemia myelodysplasia syndrome somatic                                |
| <i>BCOR</i>    | X  | Microphthalmia syndromic 2                                                       |
| <i>BRWD3</i>   | X  | Mental retardation X-linked 93                                                   |
| <i>CASK</i>    | X  | FG syndrome 4                                                                    |
| <i>CDKL5</i>   | X  | Angelman syndrome-like                                                           |
| <i>CUL4B</i>   | X  | Mental retardation X-linked syndromic 15 (Cabezas type)                          |
| <i>DCX</i>     | X  | Lissencephaly X-linked                                                           |
| <i>DKC1</i>    | X  | Dyskeratosis congenita X-linked                                                  |
| <i>DLG3</i>    | X  | Mental retardation X-linked 90                                                   |
| <i>DMD</i>     | X  | Becker muscular dystrophy                                                        |
| <i>FGD1</i>    | X  | Aarskog-Scott syndrome                                                           |
| <i>FLNA</i>    | X  | Cardiac valvular dysplasia X-linked                                              |
| <i>FMR1</i>    | X  | Fragile X syndrome                                                               |
| <i>FTSJ1</i>   | X  | Mental retardation X-linked 9                                                    |

|                 |   |                                                                                            |
|-----------------|---|--------------------------------------------------------------------------------------------|
| <i>GDI1</i>     | X | Mental retardation X-linked 41                                                             |
| <i>GK</i>       | X | Glycerol kinase deficiency                                                                 |
| <i>GPC3</i>     | X | Simpson-Golabi-Behmel syndrome type 1                                                      |
| <i>GRIA3</i>    | X | Mental retardation X-linked 94                                                             |
| <i>HCCS</i>     | X | Microphthalmia syndromic 7                                                                 |
| <i>HCFC1</i>    | X | Mental retardation X-linked 3                                                              |
| <i>HDAC8</i>    | X | Cornelia de Lange syndrome 5                                                               |
| <i>HPRT1</i>    | X | HPRT-related gout                                                                          |
| <i>HSD17B10</i> | X | 17-beta-hydroxysteroid dehydrogenase X deficiency                                          |
| <i>IDS</i>      | X | Mucopolysaccharidosis II                                                                   |
| <i>IKBKG</i>    | X | Ectodermal dysplasia hypohidrotic with immune deficiency                                   |
| <i>IL1RAPL1</i> | X | Mental retardation X-linked 21/34                                                          |
| <i>IQSEC2</i>   | X | Mental retardation X-linked 1                                                              |
| <i>KANSL1</i>   | X | Koolen-De Vries syndrome                                                                   |
| <i>KDM5C</i>    | X | Mental retardation X-linked syndromic Claes-Jensen type                                    |
| <i>KDM6A</i>    | X | Kabuki syndrome 2                                                                          |
| <i>KMT2D</i>    | X | Kabuki syndrome 1                                                                          |
| <i>KRBOX4</i>   | X | -                                                                                          |
| <i>L1CAM</i>    | X | Corpus callosum partial agenesis of                                                        |
| <i>LAMP2</i>    | X | Danon disease                                                                              |
| <i>MAGT1</i>    | X | Immunodeficiency X-linked with magnesium defect Epstein-Barr virus infection and neoplasia |
| <i>MAOA</i>     | X | Brunner syndrome                                                                           |
| <i>MECP2</i>    | X | Angelman syndrome                                                                          |
| <i>MED12</i>    | X | Lujan-Fryns syndrome                                                                       |
| <i>MID1</i>     | X | Opitz GBBB syndrome type I                                                                 |
| <i>MPLKIP</i>   | X | Trichothiodystrophy nonphotosensitive 1                                                    |
| <i>NAA10</i>    | X | N-terminal acetyltransferase deficiency                                                    |
| <i>NDP</i>      | X | Exudative vitreoretinopathy X-linked                                                       |
| <i>NDUFA1</i>   | X | Mitochondrial complex I deficiency                                                         |
| <i>NHS</i>      | X | Cataract 40 X-linked                                                                       |
| <i>NLGN4X</i>   | X | -                                                                                          |

|                |   |                                                                                          |
|----------------|---|------------------------------------------------------------------------------------------|
| <i>NSDHL</i>   | X | CHILD syndrome                                                                           |
| <i>OCRL</i>    | X | Dent disease 2                                                                           |
| <i>OFD1</i>    | X | Joubert syndrome 10                                                                      |
| <i>OPHN1</i>   | X | Mental retardation X-linked with cerebellar hypoplasia and distinctive facial appearance |
| <i>PAK3</i>    | X | Mental retardation X-linked 30/47                                                        |
| <i>PCDH19</i>  | X | Epileptic encephalopathy early infantile 9                                               |
| <i>PDHA1</i>   | X | Leigh syndrome X-linked                                                                  |
| <i>PGK1</i>    | X | Phosphoglycerate kinase 1 deficiency                                                     |
| <i>PHF6</i>    | X | Borjeson-Forssman-Lehmann syndrome                                                       |
| <i>PHF8</i>    | X | Mental retardation syndrome X-linked Siderius type                                       |
| <i>PLP1</i>    | X | Pelizaeus-Merzbacher disease                                                             |
| <i>PORCN</i>   | X | Focal dermal hypoplasia                                                                  |
| <i>PQBP1</i>   | X | Renpenning syndrome                                                                      |
| <i>PRPS1</i>   | X | Arts syndrome                                                                            |
| <i>PTCHD1</i>  | X | -                                                                                        |
| <i>RAB39B</i>  | X | Mental retardation X-linked 72                                                           |
| <i>RAB40AL</i> | X | Mental retardation X-linked syndromic Martin-Probst type                                 |
| <i>RPS6KA3</i> | X | Coffin-Lowry syndrome                                                                    |
| <i>SC5D</i>    | X | -                                                                                        |
| <i>SHROOM4</i> | X | Stocco dos Santos X-linked mental retardation syndrome                                   |
| <i>SLC16A2</i> | X | Allan-Herndon-Dudley syndrome                                                            |
| <i>SLC6A8</i>  | X | Cerebral creatine deficiency syndrome 1                                                  |
| <i>SLC9A6</i>  | X | Mental retardation X-linked syndromic Christianson type                                  |
| <i>SMC1A</i>   | X | -                                                                                        |
| <i>SMS</i>     | X | Mental retardation X-linked Snyder-Robinson type                                         |
| <i>SOX3</i>    | X | Mental retardation X-linked with isolated growth hormone deficiency                      |
| <i>SRPX2</i>   | X | Rolandic epilepsy mental retardation and speech dyspraxia                                |
| <i>SYN1</i>    | X | Epilepsy X-linked with variable learning disabilities and behavior disorders             |
| <i>SYP</i>     | X | Mental retardation X-linked 96                                                           |
| <i>TIMM8A</i>  | X | Deafness X-linked 1                                                                      |
| <i>TSPAN7</i>  | X | Mental retardation X-linked 58                                                           |



|               |   |                                                       |
|---------------|---|-------------------------------------------------------|
| <i>UBE2A</i>  | X | Mental retardation X-linked syndromic Nascimento-type |
| <i>UPF3B</i>  | X | Mental retardation X-linked syndromic 14              |
| <i>ZDHHC9</i> | X | Mental retardation X-linked syndromic Raymond type    |
| <i>ZNF41</i>  | X | Mental retardation X-linked 89                        |
| <i>ZNF674</i> | X | Mental retardation X-linked 92                        |
| <i>ZNF711</i> | X | Mental retardation X-linked 97                        |
| <i>ZNF81</i>  | X | Mental retardation X-linked 45                        |

---
