# Supplementary material for: Contribution of Intellectual Disability–Related Genes to ADHD Risk and to Locomotor Activity in Drosophila
Source: Atypon-hosted journal article supplement (doi:10.1176/appi.ajp.2019.18050599), 2020-02-12
Supplement: appi.ajp.2019.18050599.ds003_tables3.pdf [file appi.ajp.2019.18050599.ds003_tables3.pdf]

**TABLE S3.** Results of gene-based association analyses for 396 ID-related genes with ADHD risk in the PGC ADHD meta-analytic data (n=19,210). Results for both KGG and MAGMA analyses, using a 100kb flanking region, are shown.

| Symbol         | EntrezID | Chromosome | KGG    |             | MAGMA  |            |
|----------------|----------|------------|--------|-------------|--------|------------|
|                |          |            | # SNPs | P           | # SNPs | P          |
| <i>MEF2C</i>   | 4208     | 5          | 699    | 0.000013    | 546    | 0.0001497  |
| <i>ST3GAL3</i> | 6487     | 1          | 1189   | 0.0000618   | 776    | 0.00068088 |
| <i>BBS7</i>    | 55212    | 4          | 628    | 0.000347    | 537    | 0.0013212  |
| <i>GPR56</i>   | 9289     | 16         | 585    | 0.00278     | 533    | 0.0017071  |
| <i>ASL</i>     | 435      | 7          | 594    | 0.000773    | 498    | 0.0025384  |
| <i>TRAPPC9</i> | 83696    | 8          | 2241   | 0.000000781 | 1979   | 0.0035331  |
| <i>ARFGEF2</i> | 10564    | 20         | 995    | 0.00927     | 728    | 0.0040172  |
| <i>PEX26</i>   | 55670    | 22         | 543    | 0.0248      | 470    | 0.0046159  |
| <i>GUSB</i>    | 2990     | 7          | 513    | 0.0153      | 431    | 0.0058534  |
| <i>ALG1</i>    | 56052    | 16         | 321    | 0.00461     | 272    | 0.014585   |
| <i>MAT1A</i>   | 4143     | 10         | 852    | 0.00515     | 709    | 0.017966   |
| <i>LIG4</i>    | 3981     | 13         | 536    | 0.00445     | 451    | 0.019828   |
| <i>ATR</i>     | 545      | 3          | 945    | 0.0228      | 591    | 0.021092   |
| <i>ALG2</i>    | 85365    | 9          | 564    | 0.053       | 455    | 0.022287   |
| <i>ABCC9</i>   | 10060    | 12         | 572    | 0.036       | 451    | 0.023248   |
| <i>RFT1</i>    | 91869    | 3          | 647    | 0.00377     | 545    | 0.0269     |
| <i>NDUFA11</i> | 126328   | 19         | 203    | 0.192       | 179    | 0.027452   |
| <i>TCF4</i>    | 6925     | 18         | N/A    | N/A         | 1016   | 0.027539   |
| <i>CRBN</i>    | 51185    | 3          | 973    | 0.0185      | 773    | 0.028749   |
| <i>KCTD7</i>   | 154881   | 7          | 773    | 0.0207      | 655    | 0.029168   |
| <i>BSCL2</i>   | 26580    | 11         | 242    | 0.0428      | 181    | 0.031856   |
| <i>SMOC1</i>   | 64093    | 14         | 1283   | 0.0334      | 1092   | 0.033258   |

|                 |        |    |      |         |      |          |
|-----------------|--------|----|------|---------|------|----------|
| <i>SLC35C1</i>  | 55343  | 11 | 575  | 0.0275  | 499  | 0.037417 |
| <i>RMND1</i>    | 55005  | 6  | 817  | 0.117   | 652  | 0.041922 |
| <i>NDUFS4</i>   | 4724   | 5  | 1371 | 0.0271  | 1009 | 0.045524 |
| <i>RNASEH2A</i> | 10535  | 19 | 138  | 0.0464  | 123  | 0.047939 |
| <i>DIP2B</i>    | 57609  | 12 | 928  | 0.0385  | 662  | 0.049517 |
| <i>AKT3</i>     | 10000  | 1  | 946  | 0.0626  | 689  | 0.056514 |
| <i>CEP290</i>   | 80184  | 12 | 559  | 0.0954  | 378  | 0.057147 |
| <i>PNP</i>      | 4860   | 14 | 439  | 0.0291  | 391  | 0.061468 |
| <i>HRAS</i>     | 3265   | 11 | 213  | 0.223   | 194  | 0.061661 |
| <i>ACTG1</i>    | 71     | 17 | 411  | 0.0788  | 349  | 0.063386 |
| <i>IGF1</i>     | 3479   | 12 | 688  | 0.0228  | 572  | 0.065851 |
| <i>SYNGAP1</i>  | 8831   | 6  | 706  | 0.4     | 603  | 0.066377 |
| <i>ERLIN2</i>   | 11160  | 8  | 46   | 0.121   | 41   | 0.070461 |
| <i>CDK5RAP2</i> | 55755  | 9  | 633  | 0.0574  | 416  | 0.072062 |
| <i>SIL1</i>     | 64374  | 5  | 715  | 0.14    | 473  | 0.073523 |
| <i>BRAF</i>     | 673    | 7  | 866  | 0.119   | 624  | 0.073564 |
| <i>ISPD</i>     | 729920 | 7  | 2441 | 0.0147  | 1753 | 0.074    |
| <i>LRPPRC</i>   | 10128  | 2  | 1230 | 0.0482  | 1053 | 0.074386 |
| <i>NF1</i>      | 4763   | 17 | 634  | 0.134   | 365  | 0.075401 |
| <i>SOBP</i>     | 55084  | 6  | 1022 | 0.113   | 813  | 0.077303 |
| <i>GFAP</i>     | 2670   | 17 | 647  | 0.12    | 523  | 0.084008 |
| <i>CEP41</i>    | 95681  | 7  | 595  | 0.0234  | 487  | 0.085406 |
| <i>NLRP3</i>    | 114548 | 1  | 785  | 0.0463  | 674  | 0.088691 |
| <i>IER3IP1</i>  | 51124  | 18 | 728  | 0.0874  | 580  | 0.089537 |
| <i>AP4E1</i>    | 23431  | 15 | 944  | 0.105   | 635  | 0.091539 |
| <i>GSS</i>      | 2937   | 20 | N/A  | N/A     | 404  | 0.1004   |
| <i>NDUFS3</i>   | 4722   | 11 | 348  | 0.00677 | 268  | 0.1005   |
| <i>KCNK9</i>    | 51305  | 8  | 902  | 0.0277  | 728  | 0.1101   |
| <i>GATAD2B</i>  | 57459  | 1  | 507  | 0.492   | 374  | 0.11025  |
| <i>BBS2</i>     | 583    | 16 | 641  | 0.17    | 561  | 0.1119   |
| <i>HPD</i>      | 3242   | 12 | 667  | 0.0105  | 540  | 0.1136   |
| <i>BBS12</i>    | 166379 | 4  | 554  | 0.143   | 461  | 0.11454  |

|               |        |    |      |        |      |         |
|---------------|--------|----|------|--------|------|---------|
| <i>BCKDHA</i> | 593    | 19 | 382  | 0.246  | 328  | 0.11596 |
| <i>PRODH</i>  | 5625   | 22 | 65   | 0.226  | 57   | 0.11633 |
| <i>ELOVL4</i> | 6785   | 6  | 945  | 0.0296 | 802  | 0.11801 |
| <i>PEX11B</i> | 8799   | 1  | 143  | 0.142  | 107  | 0.12038 |
| <i>DHCR24</i> | 1718   | 1  | 831  | 0.0872 | 733  | 0.12195 |
| <i>PEX10</i>  | 5192   | 1  | 201  | 0.123  | 186  | 0.12812 |
| <i>TGFBR1</i> | 7046   | 9  | 513  | 0.0737 | 405  | 0.1287  |
| <i>L2HGDH</i> | 79944  | 14 | 897  | 0.158  | 672  | 0.12999 |
| <i>BBS10</i>  | 79738  | 12 | 546  | 0.122  | 432  | 0.13388 |
| <i>NRXN1</i>  | 9378   | 2  | 4747 | 0.0182 | 3702 | 0.13911 |
| <i>MOCS2</i>  | 4338   | 5  | 1080 | 0.0799 | 772  | 0.14082 |
| <i>ANO10</i>  | 55129  | 3  | 1097 | 0.0158 | 684  | 0.14125 |
| <i>ADAR</i>   | 103    | 1  | 502  | 0.0737 | 402  | 0.1454  |
| <i>EFTUD2</i> | 9343   | 17 | 755  | 0.172  | 607  | 0.14584 |
| <i>PEPD</i>   | 5184   | 19 | 1370 | 0.436  | 1209 | 0.14598 |
| <i>MAN2B1</i> | 4125   | 19 | 265  | 0.0233 | 228  | 0.14706 |
| <i>MGAT2</i>  | 4247   | 14 | 452  | 0.129  | 339  | 0.15295 |
| <i>ABHD5</i>  | 51099  | 3  | 704  | 0.0626 | 535  | 0.15727 |
| <i>D2HGDH</i> | 728294 | 2  | 23   | 0.253  | 18   | 0.16895 |
| <i>TUBB2B</i> | 347733 | 6  | 502  | 0.33   | 416  | 0.17277 |
| <i>SDHA</i>   | 6389   | 5  | 884  | 0.256  | 781  | 0.17476 |
| <i>MKKS</i>   | 8195   | 20 | 946  | 0.0197 | 786  | 0.17502 |
| <i>PTPN11</i> | 5781   | 12 | 410  | 0.519  | 307  | 0.17611 |
| <i>B3GLCT</i> | 145173 | 13 | 953  | 0.193  | 694  | 0.1813  |
| <i>BCKDHB</i> | 594    | 6  | 1641 | 0.0659 | 1231 | 0.18588 |
| <i>LARP7</i>  | 51574  | 4  | 540  | 0.0905 | 421  | 0.18605 |
| <i>HDAC4</i>  | 9759   | 2  | 1260 | 0.118  | 1133 | 0.18615 |
| <i>FKRP</i>   | 79147  | 19 | 312  | 0.165  | 278  | 0.18934 |
| <i>COX15</i>  | 1355   | 10 | 585  | 0.199  | 390  | 0.19059 |
| <i>ROGDI</i>  | 79641  | 16 | 592  | 0.217  | 496  | 0.19262 |
| <i>HLCS</i>   | 3141   | 21 | 1170 | 0.297  | 1020 | 0.19597 |
| <i>SCN2A</i>  | 6326   | 2  | 1112 | 0.0447 | 820  | 0.19837 |

|                |        |    |      |         |      |         |
|----------------|--------|----|------|---------|------|---------|
| <i>SERAC1</i>  | 84947  | 6  | 1007 | 0.0491  | 823  | 0.20574 |
| <i>PPOX</i>    | 5498   | 1  | 411  | 0.553   | 351  | 0.20849 |
| <i>AMT</i>     | 275    | 3  | 374  | 0.252   | 270  | 0.20932 |
| <i>GALT</i>    | 2592   | 9  | 558  | 0.164   | 465  | 0.21    |
| <i>LARGE</i>   | 9215   | 22 | 2912 | 0.281   | 2418 | 0.21022 |
| <i>NDUFS2</i>  | 4720   | 1  | 479  | 0.488   | 411  | 0.21084 |
| <i>MTRR</i>    | 4552   | 5  | 1130 | 0.02    | 960  | 0.21177 |
| <i>GATM</i>    | 2628   | 15 | 518  | 0.157   | 322  | 0.21285 |
| <i>EMX2</i>    | 2018   | 10 | 742  | 0.371   | 663  | 0.22101 |
| <i>MTR</i>     | 4548   | 1  | 1124 | 0.331   | 892  | 0.22118 |
| <i>SCO2</i>    | 9997   | 22 | 455  | 0.358   | 411  | 0.22187 |
| <i>PIK3R2</i>  | 5296   | 19 | 588  | 0.231   | 527  | 0.22452 |
| <i>DNAJC19</i> | 131118 | 3  | 353  | 0.221   | 284  | 0.22938 |
| <i>MBD5</i>    | 55777  | 2  | 1667 | 0.194   | 1298 | 0.23779 |
| <i>SCN8A</i>   | 6334   | 12 | 827  | 0.244   | 643  | 0.2425  |
| <i>TSC2</i>    | 7249   | 16 | 88   | 0.0677  | 77   | 0.24258 |
| <i>MAP2K2</i>  | 5605   | 19 | 136  | 0.47    | 127  | 0.24392 |
| <i>ALG9</i>    | 79796  | 11 | 367  | 0.432   | 287  | 0.24506 |
| <i>NDUFA12</i> | 55967  | 12 | 1017 | 0.189   | 870  | 0.24537 |
| <i>ZNF592</i>  | 9640   | 15 | 647  | 0.189   | 536  | 0.24602 |
| <i>ADSL</i>    | 158    | 22 | 351  | 0.268   | 258  | 0.25344 |
| <i>TUSC3</i>   | 7991   | 8  | 2620 | 0.00851 | 1836 | 0.25765 |
| <i>NDUFV1</i>  | 4723   | 11 | 372  | 0.0254  | 331  | 0.25962 |
| <i>UPB1</i>    | 51733  | 22 | 446  | 0.0965  | 365  | 0.26    |
| <i>AGA</i>     | 175    | 4  | 499  | 0.0164  | 398  | 0.26062 |
| <i>CACNG2</i>  | 10369  | 22 | 898  | 0.337   | 760  | 0.2664  |
| <i>SETBP1</i>  | 26040  | 18 | 1290 | 0.368   | 1028 | 0.26729 |
| <i>ERCC8</i>   | 1161   | 5  | 805  | 0.553   | 628  | 0.27432 |
| <i>GLI2</i>    | 2736   | 2  | 871  | 0.202   | 732  | 0.27469 |
| <i>NKX2-1</i>  | 7080   | 14 | 547  | 0.0694  | 467  | 0.28185 |
| <i>RELN</i>    | 5649   | 7  | 2938 | 0.184   | 2386 | 0.28492 |
| <i>ANKH</i>    | 56172  | 5  | 819  | 0.279   | 688  | 0.28541 |

|                 |        |    |      |        |      |         |
|-----------------|--------|----|------|--------|------|---------|
| <i>ARID1B</i>   | 57492  | 6  | 839  | 0.0577 | 622  | 0.28814 |
| <i>SLC25A22</i> | 79751  | 11 | 186  | 0.447  | 168  | 0.28879 |
| <i>VPS13B</i>   | 157680 | 8  | 1886 | 0.103  | 1406 | 0.28882 |
| <i>SKI</i>      | 6497   | 1  | 404  | 0.328  | 359  | 0.2889  |
| <i>CNTNAP2</i>  | 26047  | 7  | 9478 | 0.608  | 7554 | 0.29054 |
| <i>DHCR7</i>    | 1717   | 11 | 948  | 0.267  | 785  | 0.29439 |
| <i>PUS1</i>     | 80324  | 12 | 187  | 0.215  | 161  | 0.29483 |
| <i>CEP152</i>   | 22995  | 15 | 627  | 0.331  | 466  | 0.2954  |
| <i>ABCD4</i>    | 5826   | 14 | 340  | 0.434  | 300  | 0.29612 |
| <i>MLYCD</i>    | 23417  | 16 | 883  | 0.0772 | 757  | 0.29617 |
| <i>UBE3A</i>    | 7337   | 15 | 885  | 0.316  | 679  | 0.2973  |
| <i>PRSS12</i>   | 8492   | 4  | 969  | 0.554  | 741  | 0.29869 |
| <i>MYCN</i>     | 4613   | 2  | 458  | 0.291  | 403  | 0.3019  |
| <i>CEP135</i>   | 9662   | 4  | 877  | 0.101  | 695  | 0.30362 |
| <i>ANKRD11</i>  | 29123  | 16 | 969  | 0.225  | 811  | 0.3072  |
| <i>SMARCA2</i>  | 6595   | 9  | 1295 | 0.052  | 1060 | 0.31686 |
| <i>ALDH18A1</i> | 5832   | 10 | 1072 | 0.802  | 897  | 0.31735 |
| <i>CTDP1</i>    | 9150   | 18 | 702  | 0.0663 | 614  | 0.32399 |
| <i>WDR62</i>    | 284403 | 19 | 358  | 0.306  | 312  | 0.32511 |
| <i>MOCS1</i>    | 4337   | 6  | 777  | 0.254  | 603  | 0.32514 |
| <i>CC2D1A</i>   | 54862  | 19 | 26   | 0.445  | 25   | 0.32936 |
| <i>C5orf42</i>  | 65250  | 5  | 744  | 0.381  | 457  | 0.33386 |
| <i>MMAA</i>     | 166785 | 4  | 665  | 0.0765 | 584  | 0.33626 |
| <i>ALG6</i>     | 29929  | 1  | 707  | 0.251  | 450  | 0.33912 |
| <i>PIGV</i>     | 55650  | 1  | 272  | 0.145  | 229  | 0.34012 |
| <i>ARID1A</i>   | 8289   | 1  | 281  | 0.191  | 234  | 0.34026 |
| <i>GCH1</i>     | 2643   | 14 | 838  | 0.333  | 601  | 0.34242 |
| <i>GJC2</i>     | 57165  | 1  | 548  | 0.381  | 337  | 0.3439  |
| <i>GTF2H5</i>   | 404672 | 6  | 987  | 0.0725 | 799  | 0.34673 |
| <i>SMAD4</i>    | 4089   | 18 | 395  | 0.397  | 296  | 0.3487  |
| <i>FBN1</i>     | 2200   | 15 | 1069 | 0.562  | 767  | 0.34961 |
| <i>PEX5</i>     | 5830   | 12 | 551  | 0.657  | 472  | 0.34965 |

|                 |        |    |      |        |      |         |
|-----------------|--------|----|------|--------|------|---------|
| <i>DPYD</i>     | 1806   | 1  | 2396 | 0.636  | 2014 | 0.35117 |
| <i>PDSS2</i>    | 57107  | 6  | 1106 | 0.541  | 891  | 0.35286 |
| <i>CCBE1</i>    | 147372 | 18 | 1773 | 0.188  | 1474 | 0.35565 |
| <i>ASXL1</i>    | 171023 | 20 | 436  | 0.227  | 324  | 0.35749 |
| <i>AP4S1</i>    | 11154  | 14 | 715  | 0.429  | 466  | 0.36452 |
| <i>MMACHC</i>   | 25974  | 1  | N/A  | N/A    | 332  | 0.36686 |
| <i>CACNA1C</i>  | 775    | 12 | 2020 | 0.224  | 1729 | 0.36866 |
| <i>DYRK1A</i>   | 1859   | 21 | 1039 | 0.423  | 825  | 0.38395 |
| <i>AIMP1</i>    | 9255   | 4  | 680  | 0.866  | 422  | 0.38627 |
| <i>STRA6</i>    | 64220  | 15 | 317  | 0.625  | 284  | 0.39339 |
| <i>SLC33A1</i>  | 9197   | 3  | 758  | 0.0803 | 612  | 0.40242 |
| <i>STIL</i>     | 6491   | 1  | 767  | 0.683  | 641  | 0.40511 |
| <i>FOXP1</i>    | 27086  | 3  | 1631 | 0.268  | 1370 | 0.40703 |
| <i>ALG12</i>    | 79087  | 22 | 442  | 0.557  | 395  | 0.41252 |
| <i>SHOC2</i>    | 8036   | 10 | 602  | 0.68   | 450  | 0.41496 |
| <i>RAB27A</i>   | 5873   | 15 | 1172 | 0.443  | 942  | 0.41674 |
| <i>NTRK1</i>    | 4914   | 1  | 514  | 0.594  | 402  | 0.41681 |
| <i>POLR3A</i>   | 11128  | 10 | 512  | 0.512  | 385  | 0.42103 |
| <i>MYO5A</i>    | 4644   | 15 | 1394 | 0.484  | 997  | 0.4212  |
| <i>FANCD2</i>   | 2177   | 3  | 747  | 0.629  | 643  | 0.42276 |
| <i>BBS1</i>     | 582    | 11 | 316  | 0.886  | 270  | 0.42472 |
| <i>PTEN</i>     | 5728   | 10 | 676  | 0.705  | 545  | 0.42545 |
| <i>PDSS1</i>    | 23590  | 10 | 973  | 0.573  | 724  | 0.42556 |
| <i>DPAGT1</i>   | 1798   | 11 | 418  | 0.414  | 352  | 0.42567 |
| <i>PHGDH</i>    | 26227  | 1  | 570  | 0.826  | 482  | 0.43053 |
| <i>BBS4</i>     | 585    | 15 | 475  | 0.354  | 306  | 0.43705 |
| <i>RAB3GAP1</i> | 22930  | 2  | 696  | 0.35   | 509  | 0.43713 |
| <i>ZEB2</i>     | 9839   | 2  | 317  | 0.846  | 266  | 0.43914 |
| <i>TREX1</i>    | 11277  | 3  | 323  | 0.605  | 197  | 0.44218 |
| <i>HESX1</i>    | 8820   | 3  | 506  | 0.727  | 355  | 0.45103 |
| <i>MCOLN1</i>   | 57192  | 19 | 433  | 0.562  | 387  | 0.45638 |
| <i>GNS</i>      | 2799   | 12 | 479  | 0.116  | 387  | 0.45895 |

|                 |        |    |      |         |      |         |
|-----------------|--------|----|------|---------|------|---------|
| <i>GRIN2B</i>   | 2904   | 12 | 2398 | 0.297   | 1940 | 0.45966 |
| <i>SLC25A15</i> | 10166  | 13 | 828  | 0.158   | 702  | 0.45996 |
| <i>DOCK8</i>    | 81704  | 9  | 2008 | 0.863   | 1636 | 0.46165 |
| <i>ERCC3</i>    | 2071   | 2  | 726  | 0.288   | 572  | 0.46197 |
| <i>PYCR1</i>    | 5831   | 17 | 25   | 0.5     | 20   | 0.46403 |
| <i>AP3B1</i>    | 8546   | 5  | 1593 | 0.383   | 1123 | 0.4656  |
| <i>FKTN</i>     | 2218   | 9  | 683  | 0.494   | 555  | 0.46686 |
| <i>RAB18</i>    | 22931  | 10 | 962  | 0.642   | 771  | 0.46732 |
| <i>POMGNT1</i>  | 55624  | 1  | 326  | 0.759   | 271  | 0.47314 |
| <i>TECR</i>     | 9524   | 19 | 205  | 0.00967 | 181  | 0.47705 |
| <i>POC1A</i>    | 25886  | 3  | 261  | 0.423   | 204  | 0.47942 |
| <i>FH</i>       | 2271   | 1  | 597  | 0.367   | 514  | 0.48904 |
| <i>HOXA1</i>    | 3198   | 7  | 292  | 0.665   | 239  | 0.4908  |
| <i>DYM</i>      | 54808  | 18 | 1778 | 0.829   | 1369 | 0.49115 |
| <i>UBR1</i>     | 197131 | 15 | 528  | 0.788   | 291  | 0.49262 |
| <i>ACVR1</i>    | 90     | 2  | 414  | 0.789   | 338  | 0.49437 |
| <i>CTNNB1</i>   | 1499   | 3  | 660  | 0.641   | 418  | 0.4985  |
| <i>SYT14</i>    | 255928 | 1  | 1505 | 0.488   | 1011 | 0.49862 |
| <i>SRCAP</i>    | 10847  | 16 | 138  | 0.374   | 102  | 0.49922 |
| <i>NIPBL</i>    | 25836  | 5  | 907  | 0.593   | 553  | 0.50087 |
| <i>KIAA1279</i> | 26128  | 10 | N/A  | N/A     | 601  | 0.50361 |
| <i>NSUN2</i>    | 54888  | 5  | 1230 | 0.42    | 1053 | 0.50526 |
| <i>GPHN</i>     | 10243  | 14 | 3312 | 0.739   | 2557 | 0.50623 |
| <i>ZIC2</i>     | 7546   | 13 | 517  | 0.429   | 456  | 0.50706 |
| <i>ATP6V0A2</i> | 23545  | 12 | 845  | 0.479   | 684  | 0.50738 |
| <i>GRIN2A</i>   | 2903   | 16 | 3028 | 0.553   | 2435 | 0.51047 |
| <i>DLD</i>      | 1738   | 7  | 612  | 0.704   | 505  | 0.51481 |
| <i>FRAS1</i>    | 80144  | 4  | 2707 | 0.76    | 2076 | 0.51753 |
| <i>SOX10</i>    | 6663   | 22 | 315  | 0.319   | 203  | 0.51961 |
| <i>DMPK</i>     | 1760   | 19 | 277  | 0.402   | 242  | 0.51962 |
| <i>RNASEH2B</i> | 79621  | 13 | 377  | 0.119   | 325  | 0.5231  |
| <i>SMARCB1</i>  | 6598   | 22 | 829  | 0.754   | 697  | 0.52705 |

|                 |        |    |      |        |      |         |
|-----------------|--------|----|------|--------|------|---------|
| <i>ALG3</i>     | 10195  | 3  | 426  | 0.576  | 325  | 0.52736 |
| <i>SPRED1</i>   | 161742 | 15 | 985  | 0.603  | 754  | 0.5288  |
| <i>KRAS</i>     | 3845   | 12 | 913  | 0.29   | 693  | 0.53759 |
| <i>RNASEH2C</i> | 84153  | 11 | 511  | 0.519  | 412  | 0.53926 |
| <i>ADCK3</i>    | 56997  | 1  | 1017 | 0.672  | 735  | 0.54038 |
| <i>PNKP</i>     | 11284  | 19 | 168  | 0.497  | 137  | 0.54231 |
| <i>BCS1L</i>    | 617    | 2  | 408  | 0.734  | 313  | 0.54739 |
| <i>SMARCA4</i>  | 6597   | 19 | 554  | 0.714  | 487  | 0.54843 |
| <i>CDH15</i>    | 1013   | 16 | 696  | 0.598  | 637  | 0.55022 |
| <i>CA2</i>      | 760    | 8  | 474  | 0.598  | 291  | 0.55328 |
| <i>MAP2K1</i>   | 5604   | 15 | 1150 | 0.806  | 866  | 0.55855 |
| <i>FOXG1</i>    | 2290   | 14 | 367  | 0.613  | 300  | 0.56053 |
| <i>LAMA2</i>    | 3908   | 6  | 2607 | 0.631  | 1984 | 0.56105 |
| <i>NAGLU</i>    | 4669   | 17 | 376  | 0.478  | 306  | 0.56294 |
| <i>CCDC78</i>   | 124093 | 16 | 82   | 0.677  | 74   | 0.56923 |
| <i>HAX1</i>     | 10456  | 1  | 479  | 0.619  | 332  | 0.5769  |
| <i>RAI1</i>     | 10743  | 17 | 631  | 0.755  | 495  | 0.57695 |
| <i>MANBA</i>    | 4126   | 4  | 825  | 0.45   | 609  | 0.57934 |
| <i>B4GALT1</i>  | 2683   | 9  | 907  | 0.594  | 765  | 0.58124 |
| <i>BUB1B</i>    | 701    | 15 | 315  | 0.549  | 276  | 0.5821  |
| <i>TUBA1A</i>   | 7846   | 12 | 296  | 0.506  | 257  | 0.58476 |
| <i>ATP1A2</i>   | 477    | 1  | N/A  | N/A    | 393  | 0.58671 |
| <i>PEX7</i>     | 5191   | 6  | 790  | 0.922  | 575  | 0.58894 |
| <i>DARS2</i>    | 55157  | 1  | 576  | 0.173  | 377  | 0.59074 |
| <i>SHH</i>      | 6469   | 7  | 473  | 0.81   | 389  | 0.59457 |
| <i>TGFBR2</i>   | 7048   | 3  | 1172 | 0.223  | 912  | 0.59538 |
| <i>CYB5R3</i>   | 1727   | 22 | 448  | 0.852  | 398  | 0.59762 |
| <i>AP4B1</i>    | 10717  | 1  | 422  | 0.616  | 325  | 0.60086 |
| <i>CDON</i>     | 50937  | 11 | 1074 | 0.428  | 919  | 0.60124 |
| <i>PCNT</i>     | 5116   | 21 | 1363 | 0.95   | 1116 | 0.60493 |
| <i>MMADHC</i>   | 27249  | 2  | 644  | 0.715  | 426  | 0.6093  |
| <i>POLR3B</i>   | 55703  | 12 | 991  | 0.0894 | 797  | 0.61013 |



|                 |        |    |      |       |      |         |
|-----------------|--------|----|------|-------|------|---------|
| <i>ACSF3</i>    | 197322 | 16 | 635  | 0.702 | 585  | 0.6123  |
| <i>MRPS22</i>   | 56945  | 3  | 529  | 0.883 | 423  | 0.61276 |
| <i>PAFAH1B1</i> | 5048   | 17 | 538  | 0.668 | 472  | 0.61355 |
| <i>PLCB1</i>    | 23236  | 20 | 3186 | 0.569 | 2711 | 0.61533 |
| <i>ERCC2</i>    | 2068   | 19 | N/A  | N/A   | 189  | 0.61584 |
| <i>KIF7</i>     | 374654 | 15 | 609  | 0.643 | 488  | 0.61976 |
| <i>MCCC1</i>    | 56922  | 3  | 770  | 0.629 | 588  | 0.62289 |
| <i>XPA</i>      | 7507   | 9  | 509  | 0.859 | 381  | 0.62532 |
| <i>KIF11</i>    | 3832   | 10 | 854  | 0.571 | 690  | 0.6255  |
| <i>MUT</i>      | 4594   | 6  | 823  | 0.746 | 605  | 0.62728 |
| <i>DYNC1H1</i>  | 1778   | 14 | 726  | 0.137 | 601  | 0.6281  |
| <i>DPM1</i>     | 8813   | 20 | 447  | 0.825 | 368  | 0.63472 |
| <i>SURF1</i>    | 6834   | 9  | 910  | 0.925 | 813  | 0.63662 |
| <i>EP300</i>    | 2033   | 22 | 545  | 0.809 | 453  | 0.63682 |
| <i>SOS1</i>     | 6654   | 2  | 842  | 0.628 | 517  | 0.63694 |
| <i>THRB</i>     | 7068   | 3  | 1583 | 0.881 | 1352 | 0.63705 |
| <i>PTCH1</i>    | 5727   | 9  | 678  | 0.963 | 577  | 0.63706 |
| <i>NBN</i>      | 4683   | 8  | 722  | 0.871 | 491  | 0.63792 |
| <i>AHCY</i>     | 191    | 20 | 382  | 0.657 | 263  | 0.63825 |
| <i>GAMT</i>     | 2593   | 19 | 12   | 0.503 | 6    | 0.63875 |
| <i>NDUFS7</i>   | 374291 | 19 | 12   | 0.503 | 6    | 0.63875 |
| <i>STXBP1</i>   | 6812   | 9  | 455  | 0.483 | 397  | 0.64046 |
| <i>DNMT3B</i>   | 1789   | 20 | 851  | 0.799 | 691  | 0.64948 |
| <i>GCSH</i>     | 2653   | 16 | 853  | 0.922 | 663  | 0.65    |
| <i>MED17</i>    | 9440   | 11 | 716  | 0.476 | 581  | 0.65007 |
| <i>ERCC6</i>    | 2074   | 10 | 822  | 0.37  | 629  | 0.65031 |
| <i>PACS1</i>    | 55690  | 11 | 808  | 0.635 | 632  | 0.65075 |
| <i>FTO</i>      | 79068  | 16 | 1707 | 0.63  | 1392 | 0.65637 |
| <i>APTX</i>     | 54840  | 9  | 1037 | 0.694 | 856  | 0.65755 |
| <i>GALE</i>     | 2582   | 1  | 245  | 0.682 | 186  | 0.659   |
| <i>JAM3</i>     | 83700  | 11 | 706  | 0.87  | 524  | 0.66432 |
| <i>COQ2</i>     | 27235  | 4  | 623  | 0.218 | 545  | 0.6706  |

|                 |           |    |      |       |      |         |
|-----------------|-----------|----|------|-------|------|---------|
| <i>OCLN</i>     | 100506658 | 5  | 122  | 0.527 | 95   | 0.67163 |
| <i>AUH</i>      | 549       | 9  | 1049 | 0.914 | 898  | 0.67311 |
| <i>MCCC2</i>    | 64087     | 5  | 822  | 0.618 | 646  | 0.67598 |
| <i>PEX13</i>    | 5194      | 2  | 426  | 0.944 | 345  | 0.67886 |
| <i>LAMC3</i>    | 10319     | 9  | 367  | 0.883 | 307  | 0.68614 |
| <i>SMPD1</i>    | 6609      | 11 | 246  | 0.591 | 218  | 0.69029 |
| <i>RARS2</i>    | 57038     | 6  | 1056 | 0.925 | 737  | 0.69492 |
| <i>EIF2AK3</i>  | 9451      | 2  | 660  | 0.724 | 535  | 0.69524 |
| <i>RPGRIP1L</i> | 23322     | 16 | 786  | 0.725 | 648  | 0.69857 |
| <i>EHMT1</i>    | 79813     | 9  | 612  | 0.804 | 510  | 0.70858 |
| <i>CENPJ</i>    | 55835     | 13 | 1091 | 0.975 | 925  | 0.70892 |
| <i>TSC1</i>     | 7248      | 9  | 613  | 0.886 | 524  | 0.70925 |
| <i>ETHE1</i>    | 23474     | 19 | 439  | 0.644 | 383  | 0.71913 |
| <i>NPHP1</i>    | 4867      | 2  | 141  | 0.961 | 121  | 0.7193  |
| <i>IDUA</i>     | 3425      | 4  | 493  | 0.922 | 433  | 0.71945 |
| <i>ALDH3A2</i>  | 224       | 17 | 410  | 0.728 | 338  | 0.72135 |
| <i>ACTB</i>     | 60        | 7  | 446  | 0.737 | 406  | 0.72145 |
| <i>SRD5A3</i>   | 79644     | 4  | 908  | 0.801 | 706  | 0.72323 |
| <i>NEU1</i>     | 4758      | 6  | 545  | 0.444 | 476  | 0.72333 |
| <i>SLC12A6</i>  | 9990      | 15 | 964  | 0.363 | 794  | 0.72467 |
| <i>SLC17A5</i>  | 26503     | 6  | 957  | 0.773 | 761  | 0.72562 |
| <i>FUCA1</i>    | 2517      | 1  | 169  | 0.824 | 126  | 0.72637 |
| <i>COG8</i>     | 84342     | 16 | 504  | 0.801 | 392  | 0.7271  |
| <i>MED23</i>    | 9439      | 6  | 617  | 0.968 | 518  | 0.72892 |
| <i>GRIK2</i>    | 2898      | 6  | N/A  | N/A   | 2087 | 0.73549 |
| <i>PIGO</i>     | 84720     | 9  | 442  | 0.974 | 362  | 0.74494 |
| <i>KCNQ2</i>    | 3785      | 20 | 264  | 0.695 | 241  | 0.74542 |
| <i>TMCO1</i>    | 54499     | 1  | 747  | 0.61  | 610  | 0.74548 |
| <i>SLC4A4</i>   | 8671      | 4  | 1426 | 0.71  | 1073 | 0.7468  |
| <i>NSD1</i>     | 64324     | 5  | 843  | 0.767 | 703  | 0.74976 |
| <i>BBS5</i>     | 129880    | 2  | 765  | 0.812 | 592  | 0.75019 |
| <i>COL4A1</i>   | 1282      | 13 | 860  | 0.65  | 760  | 0.7508  |

|                |        |    |      |       |      |         |
|----------------|--------|----|------|-------|------|---------|
| <i>FGFR2</i>   | 2263   | 10 | 859  | 0.857 | 692  | 0.7511  |
| <i>ATP2A2</i>  | 488    | 12 | 620  | 0.633 | 509  | 0.75569 |
| <i>EPB41L1</i> | 2036   | 20 | 289  | 0.428 | 224  | 0.75745 |
| <i>NDUFS1</i>  | 4719   | 2  | 736  | 0.582 | 579  | 0.7651  |
| <i>TBC1D24</i> | 57465  | 16 | 150  | 0.84  | 138  | 0.76732 |
| <i>TMEM165</i> | 55858  | 4  | 885  | 0.699 | 672  | 0.76807 |
| <i>KIRREL3</i> | 84623  | 11 | 2404 | 0.317 | 2101 | 0.76896 |
| <i>TAT</i>     | 6898   | 16 | 530  | 0.992 | 401  | 0.7716  |
| <i>PAX6</i>    | 5080   | 11 | 396  | 0.999 | 320  | 0.77172 |
| <i>MPDU1</i>   | 9526   | 17 | 585  | 0.972 | 510  | 0.77833 |
| <i>CC2D2A</i>  | 57545  | 4  | 1071 | 0.995 | 836  | 0.78259 |
| <i>INPP5E</i>  | 56623  | 9  | N/A  | N/A   | 343  | 0.78488 |
| <i>GNPAT</i>   | 8443   | 1  | 605  | 0.692 | 485  | 0.7874  |
| <i>AK1</i>     | 203    | 9  | 256  | 0.837 | 232  | 0.79224 |
| <i>DDHD2</i>   | 23259  | 8  | 195  | 0.837 | 148  | 0.79255 |
| <i>PVRL1</i>   | 5818   | 11 | 788  | 0.903 | 691  | 0.79356 |
| <i>ESCO2</i>   | 157570 | 8  | 1245 | 0.989 | 863  | 0.79592 |
| <i>TGIF1</i>   | 7050   | 18 | 384  | 0.923 | 316  | 0.79826 |
| <i>SUOX</i>    | 6821   | 12 | 214  | 0.784 | 149  | 0.80018 |
| <i>TBCE</i>    | 6905   | 1  | 964  | 0.494 | 764  | 0.80263 |
| <i>BLM</i>     | 641    | 15 | 608  | 0.484 | 511  | 0.80284 |
| <i>COL4A2</i>  | 1284   | 13 | 1561 | 0.958 | 1377 | 0.81148 |
| <i>PIGN</i>    | 23556  | 18 | 1656 | 1     | 1344 | 0.81664 |
| <i>RBM28</i>   | 55131  | 7  | 407  | 0.941 | 366  | 0.8181  |
| <i>PC</i>      | 5091   | 11 | 388  | 0.869 | 285  | 0.8187  |
| <i>NAGA</i>    | 4668   | 22 | 594  | 0.534 | 446  | 0.81917 |
| <i>RAD21</i>   | 5885   | 8  | 677  | 0.926 | 519  | 0.82575 |
| <i>KCNJ11</i>  | 3767   | 11 | 630  | 0.749 | 547  | 0.83518 |
| <i>TMEM231</i> | 79583  | 16 | 700  | 0.976 | 550  | 0.83986 |
| <i>SIX3</i>    | 6496   | 2  | 863  | 0.895 | 758  | 0.84347 |
| <i>LRP2</i>    | 4036   | 2  | 1130 | 0.95  | 941  | 0.8444  |
| <i>COG7</i>    | 91949  | 16 | 477  | 0.862 | 393  | 0.84641 |

|                   |           |    |      |       |      |         |
|-------------------|-----------|----|------|-------|------|---------|
| <i>POMT2</i>      | 29954     | 14 | 922  | 0.993 | 767  | 0.85018 |
| <i>ARL6</i>       | 84100     | 3  | 379  | 0.98  | 291  | 0.85048 |
| <i>KCNT1</i>      | 57582     | 9  | 570  | 0.988 | 516  | 0.86095 |
| <i>PMM2</i>       | 5373      | 16 | 955  | 0.82  | 767  | 0.86325 |
| <i>ALDH5A1</i>    | 7915      | 6  | 1395 | 0.976 | 1129 | 0.86436 |
| <i>ACO2</i>       | 50        | 22 | 477  | 0.932 | 361  | 0.86465 |
| <i>NDUFS8</i>     | 4728      | 11 | 254  | 0.921 | 229  | 0.86732 |
| <i>KAT6B</i>      | 23522     | 10 | 896  | 0.94  | 679  | 0.86835 |
| <i>NDE1</i>       | 54820     | 16 | 825  | 0.682 | 636  | 0.87191 |
| <i>PANK2</i>      | 80025     | 20 | 548  | 0.953 | 450  | 0.87317 |
| <i>DHTKD1</i>     | 55526     | 10 | 702  | 0.87  | 612  | 0.87481 |
| <i>BIVM-ERCC5</i> | 100533467 | 13 | 812  | 0.985 | 646  | 0.87721 |
| <i>ASPA</i>       | 443       | 17 | 557  | 0.802 | 455  | 0.88161 |
| <i>CREBBP</i>     | 1387      | 16 | 385  | 0.59  | 345  | 0.88333 |
| <i>DHFR</i>       | 1719      | 5  | 993  | 0.978 | 791  | 0.88364 |
| <i>TTC8</i>       | 123016    | 14 | 795  | 0.847 | 622  | 0.88761 |
| <i>DBT</i>        | 1629      | 1  | 757  | 0.975 | 516  | 0.89141 |
| <i>GLDC</i>       | 2731      | 9  | 1262 | 0.99  | 1074 | 0.89223 |
| <i>POMT1</i>      | 10585     | 9  | 612  | 0.954 | 499  | 0.89472 |
| <i>ACOX1</i>      | 51        | 17 | 391  | 0.752 | 324  | 0.89531 |
| <i>VLDLR</i>      | 7436      | 9  | 1096 | 0.983 | 868  | 0.89926 |
| <i>RAF1</i>       | 5894      | 3  | 937  | 0.996 | 728  | 0.89927 |
| <i>COG1</i>       | 9382      | 17 | 429  | 0.987 | 371  | 0.9023  |
| <i>SATB2</i>      | 23314     | 2  | 691  | 0.835 | 479  | 0.90254 |
| <i>SLC2A1</i>     | 6513      | 1  | 534  | 0.994 | 442  | 0.9027  |
| <i>COLEC11</i>    | 78989     | 2  | 502  | 0.997 | 440  | 0.9038  |
| <i>SNAP29</i>     | 9342      | 22 | 612  | 0.994 | 467  | 0.90543 |
| <i>ORC1</i>       | 4998      | 1  | 400  | 0.857 | 212  | 0.90979 |
| <i>CBS</i>        | 875       | 21 | 859  | 0.993 | 739  | 0.90986 |
| <i>SCN1A</i>      | 6323      | 2  | 1454 | 0.999 | 1061 | 0.91563 |
| <i>FGFR3</i>      | 2261      | 4  | 234  | 0.87  | 209  | 0.91898 |
| <i>ACAD9</i>      | 28976     | 3  | 809  | 0.981 | 659  | 0.93143 |

|                   |        |    |      |       |      |         |
|-------------------|--------|----|------|-------|------|---------|
| <i>GAD1</i>       | 2571   | 2  | 810  | 0.991 | 609  | 0.9316  |
| <i>MAN1B1</i>     | 11253  | 9  | 117  | 0.819 | 92   | 0.93642 |
| <i>CHD7</i>       | 55636  | 8  | 1073 | 0.997 | 747  | 0.93973 |
| <i>ASPM</i>       | 259266 | 1  | 811  | 0.99  | 373  | 0.94186 |
| <i>PEX1</i>       | 5189   | 7  | 453  | 0.951 | 362  | 0.94269 |
| <i>TMEM67</i>     | 91147  | 8  | 599  | 0.974 | 427  | 0.94332 |
| <i>GRIN1</i>      | 2902   | 9  | 49   | 0.863 | 31   | 0.94713 |
| <i>AHI1</i>       | 54806  | 6  | 773  | 0.987 | 536  | 0.95174 |
| <i>MCPH1</i>      | 79648  | 8  | 2553 | 1     | 2066 | 0.95217 |
| <i>AGPAT2</i>     | 10555  | 9  | 56   | 0.963 | 45   | 0.95552 |
| <i>TMEM237</i>    | 65062  | 2  | 664  | 0.984 | 569  | 0.96183 |
| <i>SALL1</i>      | 6299   | 16 | 410  | 0.996 | 354  | 0.96535 |
| <i>GNAS</i>       | 2778   | 20 | 655  | 0.93  | 533  | 0.97061 |
| <i>GLI3</i>       | 2737   | 7  | 1336 | 0.968 | 1152 | 0.9746  |
| <i>SMC3</i>       | 9126   | 10 | 853  | 1     | 664  | 0.97766 |
| <i>ARL13B</i>     | 200894 | 3  | 191  | 0.987 | 145  | 0.98066 |
| <i>MVK</i>        | 4598   | 12 | 745  | 0.999 | 624  | 0.99153 |
| <i>BBS9</i>       | 27241  | 7  | 2468 | 1     | 1937 | 0.99834 |
| <i>CHKB-CPT1B</i> | 386593 | 22 | 420  | 0.24  | N/A  | N/A     |
| <i>SOX2-OT</i>    | 347689 | 3  | 531  | 0.31  | N/A  | N/A     |
| <i>RAB3GAP2</i>   | 6791   | 1  | 841  | 0.908 | N/A  | N/A     |
| <i>B4GALT7</i>    | 11285  | 5  | 6    | N/A   | N/A  | N/A     |

N/A: no gene-based result obtained for this gene.
